# Supplementary material for: Genetic Parameters of Semen Traits and Their Correlations with Conformation Traits in Chinese Holstein Bulls
Source: Vet Med Int. 2024 Jan 29;2024:5593703. doi: 10.1155/2024/5593703 (PMC10843862; doi:10.1155/2024/5593703)
Supplement: Supplementary Materials — Supplementary File 1: the detailed information of seven semen traits and nine conformation traits. [file 5593703.f1.txt]

ID	SeqID	cjl	hl	md	jxl	jzzs	zhjzs	dhhl	tz	qjg	txc	xw	fw	gw	kk	szbg	ynzj
09001	1034	6.65	63	16.47		109.5255	69.001065
09002	1034	7.79	72	14.03		109.2937	78.691464
09003	1034	9.58	70	11.67		111.7986	78.25902
09004	1034	7.88	71	12.72		100.2336	71.165856
09005	1034	7.41	68	12.76		94.5516	64.295088
09006	1034	7.78	70	20.09		156.3002	109.41014
09007	1034	7.69	70	15.59		119.8871	83.92097
09008	1034	9.45	70	16.05		151.6725	106.17075
09009	1034	9.23	76	14.58		134.5734	102.275784
09010	1034	6.95	72	11.48		79.786	57.44592
09011	1034	10.83	75	15.03		162.7749	122.081175
09012	1034	8.69	70	13.98		121.4862	85.04034
09013	1034	6.24	70	14.31		89.2944	62.50608
09014	1034	6.73	69	12.36		83.1828	57.396132
09015	1034	7	70	14.29		100.03	70.021
09016	1034	7.89	75	13.74		108.4086	81.30645
09017	1034	7.25	75	13.42		97.295	72.97125
09018	1034	6.92	72	13.32		92.1744	66.365568
09019	1034	6.62	71	15.12		100.0944	71.067024
09020	1034	8.22	68	16.93		139.1646	94.631928
09021	1034	7.46	75	14.62		109.0652	81.7989
09022	1034	7.87	62	9.68		76.1816	47.232592
09023	1034	5.6	73	15.64		87.584	63.93632
09024	1034	6.84	71	12.5		85.5	60.705
09025	1034	6.58	76	13.37		87.9746	66.860696
09026	1034	9.11	71	9.21		83.9031	59.571201
09027	1034	7.73	73	13.11		101.3403	73.978419
09028	1034	6.82	71	16.64		113.4848	80.574208
09029	1034	7.6	75	11.46		87.096	65.322
09030	1034	7.18	76	15.4		110.572	84.03472
09031	1034	6.38	70	18.97		121.0286	84.72002
09032	1034	6.93	63	13.23		91.6839	57.760857
09033	1034	10.67	71	17.14		182.8838	129.847498
09034	1034	5.92	60	9.65		57.128	34.2768
09035	1034	7.54	73	12.64		95.3056	69.573088
09036	1034	7.26	70	14.25		103.455	72.4185
09037	1034	7.26	58	8.19		59.4594	34.486452
09038	1034	7.6	63	9.77		74.252	46.77876
09039	1034	9.53	70	15.08		143.7124	100.59868
09040	1034	7.45	62	11.36		84.632	52.47184
09041	1034	10.69	69	20.67		220.9623	152.463987
09042	1034	7.86	70	11.07		87.0102	60.90714
09043	1034	9.08	71	15.53		141.0124	100.118804
09044	1034	8.32	75	15.08		125.4656	94.0992
09045	1034	9.12	65	13.37		121.9344	79.25736
09046	1034	7.86	63	12.65		99.429	62.64027
09047	1034	6.61	62	8.93		59.0273	36.596926
09048	1034	7.06	66	16.68		117.7608	77.722128
09049	1034	7.96	67	14.5		115.42	77.3314
09050	1034	9.5	63	17.19		163.305	102.88215
09051	1034	8.5	65	15.68		133.28	86.632
09052	1034	10.23	60	8.52		87.1596	52.29576
09053	1034	10.09	63	13.94		140.6546	88.612398
09054	1034	7.79	60	9.28		72.2912	43.37472
09055	1034	9.17	63	14.9		136.633	86.07879
09056	1034	8.97	62	13.83		124.0551	76.914162
09057	1034	6.89	61	14.1		97.149	59.26089
09058	1034	9.05	68	11.62		105.161	71.50948
09059	1034	7.65	60	10.78		82.467	49.4802
09060	1034	8	74	12.98		103.84	76.8416
09061	1034	9.25	57	19.74		182.595	104.07915
09062	1034	5.02	58	22.48		112.8496	65.452768
09063	1034	9.24	40	17.81		164.5644	65.82576
09064	1034								1115	163	222	251	282	26		159	49
09065	1035	5.91	58	11.68		69.0288	40.036704
09066	1035	5.87	70	9.16		53.7692	37.63844
09067	1035	4.93	65	11.11		54.7723	35.601995
09068	1035	9.09	60	8.44		76.7196	46.03176
09069	1035	5.5	67	10.83		59.565	39.90855
09070	1035	6.86	67	11.04		75.7344	50.742048
09071	1035	6.01	63	9.18		55.1718	34.758234
09072	1035	4.51	62	10.21		46.0471	28.549202
09073	1035	8.48	58	9.42		79.8816	46.331328
09074	1035	7.7	53	8.81		67.837	35.95361
09075	1035	6.11	55	11.89		72.6479	39.956345
09076	1035	7.6	53	9.49		72.124	38.22572
09077	1035	4.76	68	13.22		62.9272	42.790496
09078	1035	6.02	60	10.14		61.0428	36.62568
09079	1035	5.01	60	10.97		54.9597	32.97582
09080	1035	5.28	60	11.53		60.8784	36.52704
09081	1035	4.73	50	10.39		49.1447	24.57235
09082	1035	5.7	55	11.08		63.156	34.7358
09083	1035	6.65	67	5.56		36.974	24.77258
09084	1035	4.41	65	10.63		46.8783	30.470895
09085	1035	7.06	50	9.31		65.7286	32.8643
09086	1035	4.13	67	8.37		34.5681	23.160627
09087	1035	5.07	72	8.6		43.602	31.39344
09088	1035	6.21	71	9.41		58.4361	41.489631
09089	1035	6.23	68	10.08		62.7984	42.702912
09090	1035	4.73	69	9.14		43.2322	29.830218
09091	1035	6.33	67	8.61		54.5013	36.515871
09092	1035	6.9	60	9.29		64.101	38.4606
09093	1035	7.18	70	10.2		73.236	51.2652
09094	1035	6.71	68	11.34		76.0914	51.742152
09095	1035	5.84	60	9.63		56.2392	33.74352
09096	1035	6.59	58	8.88		58.5192	33.941136
09097	1035	6.21	62	8.39		52.1019	32.303178
09098	1035	5.64	60	9.74		54.9336	32.96016
09099	1035	6.14	66	9.86		60.5404	39.956664
09100	1035	7.27	62	9.04		65.7208	40.746896
09101	1035	7.77	68	9.16		71.1732	48.397776
09102	1035	7.34	50	9.39		68.9226	34.4613
09103	1035	5.27	58	9.03		47.5881	27.601098
09104	1035	6.67	60	8.76		58.4292	35.05752
09105	1035	7	55	8.1		56.7	31.185
09106	1035	4.46	63	8.65		38.579	24.30477
09107	1035	7.1	62	9.81		69.651	43.18362
09108	1035	6.13	65	10.71		65.6523	42.673995
09109	1035	5.83	40	10.18		59.3494	23.73976
09110	1035	7.05	60	8.29		58.4445	35.0667
09111	1035	7.32	69	9.46		69.2472	47.780568
09112	1035	7.28	65	8.71		63.4088	41.21572
09113	1035	6.92	62	8.65		59.858	37.11196
09114	1035	5.95	64	9.01		53.6095	34.31008
09115	1035	6.09	45	11.54		70.2786	31.62537
09116	1035	7.3	57	12.26		89.498	51.01386
09117	1035	5.39	55	12.47		67.2133	36.967315
09118	1035	6.48	52	10.55		68.364	35.54928
09119	1035									167	225	254	289	25		160	38
09120	1036	7.29	68	7.02		51.1758	34.799544
09121	1036	7.53	69	10.45		78.6885	54.295065
09122	1036	8.49	68	8.46		71.8254	48.841272
09123	1036	7.09	76	11.45		81.1805	61.69718
09124	1036	6.49	69	7.51		48.7399	33.630531
09125	1036	5.29	73	6.32		33.4328	24.405944
09126	1036	8.43	70	12.66		106.7238	74.70666
09127	1036	4.87	68	9.39		45.7293	31.095924
09128	1036	8.84	70	8.81		77.8804	54.51628
09129	1036	6.61	76	12.11		80.0471	60.835796
09130	1036	6.15	76	14.12		86.838	65.99688
09131	1036	8.37	73	9.7		81.189	59.26797
09132	1036	6.48	60	6.97		45.1656	27.09936
09133	1036	7.75	72	7.62		59.055	42.5196
09134	1036	6.25	70	8.95		55.9375	39.15625
09135	1036	5.93	75	12.45		73.8285	55.371375
09136	1036	6.53	71	10.32		67.3896	47.846616
09137	1036	6	75	6.99		41.94	31.455
09138	1036	5.82	68	6.59		38.3538	26.080584
09139	1036	5.79	73	11.05		63.9795	46.705035
09140	1036	6.04	73	10.46		63.1784	46.120232
09141	1036	5.02	76	9.29		46.6358	35.443208
09142	1036	5.49	70	8.43		46.2807	32.39649
09143	1036	6.25	71	9.08		56.75	40.2925
09144	1036	6.47	78	9.5		61.465	47.9427
09145	1036	8.25	75	8.59		70.8675	53.150625
09146	1036	6.35	73	11.04		70.104	51.17592
09147	1036	5.68	73	8.4		47.712	34.82976
09148	1036	7.21	72	11.9		85.799	61.77528
09149	1036	5.43	75	8.22		44.6346	33.47595
09150	1036	7.3	69	7.82		57.086	39.38934
09151	1036	7.12	72	5.1		36.312	26.14464
09152	1036	6.47	70	8.8		56.936	39.8552
09153	1036	6.36	73	9.62		61.1832	44.663736
09154	1036	9.69	76	10.38		100.5822	76.442472
09155	1036	6.57	73	8.24		54.1368	39.519864
09156	1036	4.87	68	8.68		42.2716	28.744688
09157	1036	6.54	72	9.24		60.4296	43.509312
09158	1036	8.68	71	8.18		71.0024	50.411704
09159	1036	6.24	70	9.35		58.344	40.8408
09160	1036	6.75	68	10.08		68.04	46.2672
09161	1036	8.32	62	10.89		90.6048	56.174976
09162	1036	5.47	68	15.31		83.7457	56.947076
09163	1036	6.31	76	11.89		75.0259	57.019684
09164	1036	7.42	71	9.75		72.345	51.36495
09165	1036	6.55	66	11.02		72.181	47.63946
09166	1036	6.36	63	9.87		62.7732	39.547116
09167	1036	6.55	67	9.46		61.963	41.51521
09168	1036	6.89	69	12.29		84.6781	58.427889
09169	1036	9.58	64	9.14		87.5612	56.039168
09170	1036	6.74	71	8.11		54.6614	38.809594
09171	1036	7.17	64	9.24		66.2508	42.400512
09172	1036	9.55	65	9.53		91.0115	59.157475
09173	1036	5.35	69	8.82		47.187	32.55903
09174	1036	6.21	62	8.62		53.5302	33.188724
09175	1036	5.6	63	11.15		62.44	39.3372
09176	1036	8.96	69	7.8		69.888	48.22272
09177	1036	6.3	71	11.98		75.474	53.58654
09178	1036	11.56	68	7.83		90.5148	61.550064
09179	1036	6.87	70	8.76		60.1812	42.12684
09180	1036	6.67	72	9.49		63.2983	45.574776
09181	1036	6.73	68	8.17		54.9841	37.389188
09182	1036	5.05	67	9.25		46.7125	31.297375
09183	1036	9.72	66	6.1		59.292	39.13272
09184	1036	5.78	67	8.98		51.9044	34.775948
09185	1036	6.74	68	8.25		55.605	37.8114
09186	1036	8.62	71	14.32		123.4384	87.641264
09187	1036	6.37	68	11.74		74.7838	50.852984
09188	1036	8.75	68	6.72		58.8	39.984
09189	1036	7.31	62	10.02		73.2462	45.412644
09190	1036	4.44	61	7.3		32.412	19.77132
09191	1036	7.23	66	9.8	15.8	70.854	46.76364	45
09192	1036	6.1	67	13.4		81.74	54.7658	35
09193	1036	8.66	69	15.21	16.4	131.7186	90.885834	36
09194	1036								997	154	207	247	279	25		150	44
09195	1036								936	154	217	240	283	24	15	149	43
09196	1037	5.09	70	12.77		64.9993	45.49951
09197	1037	7.24	69	9.55		69.142	47.70798
09198	1037	8.56	80	10.13		86.7128	69.37024
09199	1037	4.16	73	6.17		25.6672	18.737056
09200	1037	8.07	70	10.32		83.2824	58.29768
09201	1037	6.39	70	10.43		66.6477	46.65339
09202	1037	6.62	76	11.64		77.0568	58.563168
09203	1037	6.72	69	14.21		95.4912	65.888928
09204	1037	7.77	68	12.42		96.5034	65.622312
09205	1037	8.17	68	11.11		90.7687	61.722716
09206	1037	8.41	70	8.5		71.485	50.0395
09207	1037	7.14	70	12.09		86.3226	60.42582
09208	1037	7.02	60	10.32		72.4464	43.46784
09209	1037	6.52	73	14.2		92.584	67.58632
09210	1037	6.44	73	10.51		67.6844	49.409612
09211	1037	8.63	73	15.01		129.5363	94.561499
09212	1037	6.17	73	9.36		57.7512	42.158376
09213	1037	3.06	68	8.98		27.4788	18.685584
09214	1037	6.4	70	15.89		101.696	71.1872
09215	1037	5.89	69	11.15		65.6735	45.314715
09216	1037	5.78	69	9.79		56.5862	39.044478
09217	1037	5.89	76	11.61		68.3829	51.971004
09218	1037	5.31	72	12.56		66.6936	48.019392
09219	1037	6.25	73	14.38		89.875	65.60875
09220	1037	7.17	70	13.26		95.0742	66.55194
09221	1037	5.87	75	10.7		62.809	47.10675
09222	1037	6.57	73	19.3		126.801	92.56473
09223	1037	8.39	80	16.97		142.3783	113.90264
09224	1037	7.04	73	11.29		79.4816	58.021568
09225	1037	7.83	78	17.5		137.025	106.8795
09226	1037	8.17	72	16.6		135.622	97.64784
09227	1037	10.38	85	15.65		162.447	138.07995
09228	1037	8.07	73	15.11		121.9377	89.014521
09229	1037	4.89	76	14.43		70.5627	53.627652
09230	1037	6.25	78	12.54		78.375	61.1325
09231	1037	3.36	72	14.93		50.1648	36.118656
09232	1037	5.64	78	15.9		89.676	69.94728
09233	1037	5.76	80	16.56		95.3856	76.30848
09234	1037	5.67	76	14.43		81.8181	62.181756
09235	1037	5.64	58	14.2		80.088	46.45104
09236	1037	8.37	67	14.06		117.6822	78.847074
09237	1037	6.44	65	13.41		86.3604	56.13426
09238	1037	5.88	73	15.03		88.3764	64.514772
09239	1037	6.98	70	11.63		81.1774	56.82418
09240	1037	7.21	69	11.5		82.915	57.21135
09241	1037	8	70	12.69		101.52	71.064
09242	1037	7.77	62	13.94		108.3138	67.154556
09243	1037	7.59	63	15.16		115.0644	72.490572
09244	1037	6.3	67	13.85		87.255	58.46085
09245	1037	7.35	60	11.98		88.053	52.8318
09246	1037	4.75	73	14.7	15.9	69.825	50.97225	40
09247	1037	6.13	61	13.55		83.0615	50.667515
09248	1037	6.44	65	17.03	13.3	109.6732	71.28758	38
09249	1037	6.96	73	16.88		117.4848	85.763904	37
09250	1037	7.02	68	13.86	14.3	97.2972	66.162096	37
09251	1037	6.67	69	19.55		130.3985	89.974965	50
09252	1037	6.76	67	11.74		79.3624	53.172808	20
09253	1037	7.8	67	11.44		89.232	59.78544	20
09254	1037	5.86	65	15.92	13.8	93.2912	60.63928	22
09255	1037	6.82	66	15.01		102.3682	67.563012	37
09256	1037	5.62	55	11.63		65.3606	35.94833
09257	1037	6.87	68	13.48		92.6076	62.973168	22
09258	1037	6.08	68	13.84	19.9	84.1472	57.220096	30
09259	1037	6.23	50	14.06		87.5938	43.7969
09260	1037	6.17	58	13.64		84.1588	48.812104
09261	1037	6.03	50	12.05		72.6615	36.33075
09262	1037	5.88	50	21.15		124.362	62.181
09263	1037	7.52	45	18.25		137.24	61.758
09264	1037	4.18	55	20.28		84.7704	46.62372
09265	1037	4.84	62	25.25		122.21	75.7702
09266	1037	3.95	58	26.94		106.413	61.71954
09267	1037	4.87	45	22.85		111.2795	50.075775
09268	1037								1071	169	240	247	284	26		160	40
09269	1037								1038	171	227	241	292	24	16	160	42
09270	1038	9.35	68	15.42		144.177	98.04036
09271	1038	2.13	73	14.19		30.2247	22.064031
09272	1038	2.61	71	16.28		42.4908	30.168468
09273	1038	9.68	70	15.49		149.9432	104.96024
09274	1038	5.61	71	14.42		80.8962	57.436302
09275	1038	8.64	70	14.08		121.6512	85.15584
09276	1038	7.59	68	12.4		94.116	63.99888
09277	1038	6.95	72	16.29		113.2155	81.51516
09278	1038	7.59	72	11.67		88.5753	63.774216
09279	1038	8.9	71	13.87		123.443	87.64453
09280	1038	7.72	71	12.11		93.4892	66.377332
09281	1038	7.48	71	12.65		94.622	67.18162
09282	1038	8.58	60	10.05		86.229	51.7374
09283	1038	6.84	64	16.51		112.9284	72.274176
09284	1038	8.19	50	11.94		97.7886	48.8943
09285	1038	6.89	68	12.6		86.814	59.03352
09286	1038	13.38	60	10.81		144.6378	86.78268
09287	1038	7.26	70	12.57		91.2582	63.88074
09288	1038	10.63	69	7.2		76.536	52.80984
09289	1038	8.13	69	11		89.43	61.7067
09290	1038	6.92	68	12.94		89.5448	60.890464
09291	1038	2.34	55	9.44		22.0896	12.14928
09292	1038	7.25	50	6.43		46.6175	23.30875
09293	1038	6.94	68	11.95		82.933	56.39444
09294	1038	4.86	70	9.75		47.385	33.1695
09295	1038	7.47	73	15.55		116.1585	84.795705
09296	1038	7.91	75	19.36		153.1376	114.8532
09297	1038	6.01	75	13.71		82.3971	61.797825
09298	1038	5.77	70	17.37		100.2249	70.15743
09299	1038	4.84	68	9.14		44.2376	30.081568
09300	1038	7.55	74	15.74		118.837	87.93938
09301	1038	7.79	73	14.11		109.9169	80.239337
09302	1038	7.85	68	14.07		110.4495	75.10566
09303	1038	7.56	68	10.37		78.3972	53.310096
09304	1038	8.09	68	13.05		105.5745	71.79066
09305	1038	6.24	73	15.34		95.7216	69.876768
09306	1038	7.06	71	16.72		118.0432	83.810672
09307	1038	7.62	69	15.39		117.2718	80.917542
09308	1038	6.83	63	16.67		113.8561	71.729343
09309	1038	7.76	67	13.72		106.4672	71.333024
09310	1038	3.64	68	14.33		52.1612	35.469616
09311	1038	6.63	62	17.6		116.688	72.34656
09312	1038	10.19	63	15.79		160.9001	101.367063
09313	1038	7.85	63	15.72		123.402	77.74326
09314	1038	4.96	63	16.38		81.2448	51.184224
09315	1038	7.13	63	14.24		101.5312	63.964656
09316	1038	3.44	63	7.37		25.3528	15.972264
09317	1038	8.46	62	14.19		120.0474	74.429388
09318	1038	4.88	60	13.65		66.612	39.9672
09319	1038	6.06	62	14.54		88.1124	54.629688
09320	1038	6.77	60	14.68		99.3836	59.63016
09321	1038	5.4	63	13.11		70.794	44.60022
09322	1038	5.58	41	14.37		80.1846	32.875686
09323	1038	4.92	58	16.37		80.5404	46.713432
09324	1038	7.51	41	12.96		97.3296	39.905136
09325	1038	9.15	58	12.41		113.5515	65.85987
09326	1038	9.8	42	15.76		154.448	64.86816
09327	1038	3.54	52	14.86		52.6044	27.354288
09328	1038	4.5	65	14.19		63.855	41.50575
09329	1038	7.46	65	13.59		101.3814	65.89791
09330	1038	7.03	70	15.73		110.5819	77.40733
09331	1038	8.31	65	14.08		117.0048	76.05312
09332	1038	9.12	67	15.78		143.9136	96.422112
09333	1038	6.74	50	14.48		97.5952	48.7976
09334	1038	5.19	65	12.09		62.7471	40.785615
09335	1038	5.84	58	12.31		71.8904	41.696432
09336	1038	7.26	52	14.43		104.7618	54.476136
09337	1038	5.82	56	15.24		88.6968	49.670208
09338	1038	7.05	50	16.87		118.9335	59.46675
09339	1038	5.27	50	15.37		80.9999	40.49995
09340	1038	5.97	65	14.01	30.6	83.6397	54.365805	35
09341	1038	4.27	65	14.21		60.6767	39.439855	33
09342	1038	4.99	58	16.11		80.3889	46.625562
09343	1038	6.9	57	15.15		104.535	59.58495
09344	1038	5.59	50	16.63		92.9617	46.48085
09345	1038	7.47	66	11.14		83.2158	54.922428	39
09346	1038	5.35	65	13.96	27	74.686	48.5459	37
09347	1038	6.29	66	17.14	28.2	107.8106	71.154996	40
09348	1038	6.69	52	16.32		109.1808	56.774016
09349	1038	6.51	60	13.09		85.2159	51.12954
09350	1038	8.17	50	15.54		126.9618	63.4809
09351	1038	5.69	50	14.29		81.3101	40.65505
09352	1038	6.54	60	15.22		99.5388	59.72328
09353	1038	7.01	43	13.63		95.5463	41.084909
09354	1038	7.16	60	16.65		119.214	71.5284
09355	1038	8.93	54	9.91		88.4963	47.788002
09356	1038	5.68	45	15.33		87.0744	39.18348
09357	1038	8.06	48	14.75		118.885	57.0648
09358	1038	4.66	52	16.5		76.89	39.9828
09359	1038	5.05	40	20.35		102.7675	41.107
09360	1038	8.5	66	14.81	17.8	125.885	83.0841	40
09361	1038	5.49	58	16.83		92.3967	53.590086
09362	1038	6.58	52	13.58		89.3564	46.465328
09363	1038	6.58	50	14.64		96.3312	48.1656
09364	1038	8.6	40	15.12		130.032	52.0128
09365	1038	6.41	56	15.87		101.7267	56.966952
09366	1038	8.88	50	15.13		134.3544	67.1772
09367	1038	7.98	48	11.65		92.967	44.62416
09368	1038	6.5	48	15.16		98.54	47.2992
09369	1038	7.05	50	15.25		107.5125	53.75625
09370	1038	7.59	51	14.93		113.3187	57.792537
09371	1038	6.95	65	13.91	23.7	96.6745	62.838425	37
09372	1038	5.59	65	12.7	19.4	70.993	46.14545	35
09373	1038	6.82	65	16.05	19.2	109.461	71.14965	35
09374	1038	3.08	50	14.09		43.3972	21.6986
09375	1038	6.89	67	13.55	23.2	93.3595	62.550865	25
09376	1038	7.05	65	15.61	20.6	110.0505	71.532825	37
09377	1038	5.32	65	15.18		80.7576	52.49244	27
09378	1038	5.1	65	11.17		56.967	37.02855	35
09379	1038	7.35	65	11.21		82.3935	53.555775	35
09380	1038	4.63	65	16.58		76.7654	49.89751	32
09381	1038	6.32	65	15.85		100.172	65.1118	35
09382	1038	9.12	65	16.08		146.6496	95.32224	36
09383	1038	2.88	65	13.28		38.2464	24.86016	36
09384	1038	7.53	65	17.82		134.1846	87.21999	35
09385	1038	6.64	65	14.01	21.6	93.0264	60.46716	22
09386	1038	7.34	66	15.78		115.8252	76.444632	22
09387	1038	6.13	65	16.81		103.0453	66.979445	36
09388	1038	4.73	65	11.62		54.9626	35.72569	25
09389	1038	7.17	65	16.87		120.9579	78.622635	35
09390	1038	6.16	48	10.72		66.0352	31.696896
09391	1038	7.44	65	9.59	22.3	71.3496	46.37724	37
09392	1038	6.86	50	12.84		88.0824	44.0412
09393	1038	6.99	65	10.77		75.2823	48.933495	36
09394	1038	6.32	65	10.94		69.1408	44.94152	32
09395	1038	7.23	65	13.73		99.2679	64.524135	25
09396	1038	5.87	55	15.26		89.5762	49.26691
09397	1038	4.68	65	14.53	19.3	68.0004	44.20026	20
09398	1038	7.81	65	11.8		92.158	59.9027	36
09399	1038	7.3	65	10.52		76.796	49.9174	36
09400	1038	7.47	65	13.36		99.7992	64.86948	34
09401	1038	7.5	50	13.59		101.925	50.9625
09402	1038	5.34	62	18.1		96.654	59.92548
09403	1038	6.57	56	12.42		81.5994	45.695664
09404	1038	7.66	65	15.34		117.5044	76.37786	35
09405	1038	7.86	55	14.12		110.9832	61.04076
09406	1038	8.67	50	14.23		123.3741	61.68705
09407	1038	7.47	50	12.37		92.4039	46.20195
09408	1038	6.22	50	15.08		93.7976	46.8988
09409	1038	4.74	55	14.19		67.2606	36.99333
09410	1038	6.62	45	15.95		105.589	47.51505
09411	1038	5.39	55	17.22		92.8158	51.04869
09412	1038	6.48	50	15.67		101.5416	50.7708
09413	1038	6.64	55	14.33		95.1512	52.33316
09414	1038	7.57	50	12.03		91.0671	45.53355
09415	1038	6.5	55	12.04		78.26	43.043
09416	1038	6	65	14.74		88.44	57.486	20
09417	1038	6.42	65	13.22	18.5	84.8724	55.16706	35
09418	1038	8.06	55	13.52		108.9712	59.93416
09419	1038	6.43	65	13.57		87.2551	56.715815	39
09420	1038	7.05	60	13.1		92.355	55.413
09421	1038	6.43	55	13.31		85.5833	47.070815
09422	1038	5.84	67	13.69	24.5	79.9496	53.566232	36
09423	1038	7.42	60	13.98		103.7316	62.23896
09424	1038	5.7	45	16.48		93.936	42.2712
09425	1038	8.02	55	15.72		126.0744	69.34092
09426	1038	6	50	17.35		104.1	52.05
09427	1038	8.66	67	17.55	26.4	151.983	101.82861	20
09428	1038	8.3	45	14.39		119.437	53.74665
09429	1038	6.98	57	17.11		119.4278	68.073846
09430	1038	6.12	57	15.47		94.6764	53.965548
09431	1038	6.99	55	13.57		94.8543	52.169865
09432	1038	7.62	67	19.71		150.1902	100.627434	25
09433	1038	7.06	60	15.93		112.4658	67.47948
09434	1038	6.9	65	16.1	20.9	111.09	72.2085	36
09435	1038	5.23	55	14.12		73.8476	40.61618
09436	1038	4.22	60	14.35		60.557	36.3342
09437	1038	7.51	52	15.46		116.1046	60.374392
09438	1038	5.17	55	15.25		78.8425	43.363375
09439	1038	6.56	58	13.47		88.3632	51.250656
09440	1038	8.56	65	14.61		125.0616	81.29004	37
09441	1038	7.22	65	13.54	18.7	97.7588	63.54322	38
09442	1038	4.86	65	15.82		76.8852	49.97538	37
09443	1038	5.69	68	15.12		86.0328	58.502304	27
09444	1038	5.81	50	12.87		74.7747	37.38735
09445	1038	6.5	45	13.69		88.985	40.04325
09446	1038	6.33	65	19.42		122.9286	79.90359	33
09447	1038	5.99	68	15.89		95.1811	64.723148	27
09448	1038	9.42	55	12.14		114.3588	62.89734
09449	1038	6.41	55	12.55		80.4455	44.245025
09450	1038	6.49	50	13.07		84.8243	42.41215
09451	1038	7.26	50	15.04		109.1904	54.5952
09452	1038	6.5	50	14.8		96.2	48.1
09453	1038	7.31	67	14.25	23.2	104.1675	69.792225	28
09454	1038	6.22	45	10.41		64.7502	29.13759
09455	1038	6.66	50	10.57		70.3962	35.1981
09456	1038	6.75	65	14.75		99.5625	64.715625	32
09457	1038	7.47	50	14.23		106.2981	53.14905
09458	1038	6.63	55	15.4		102.102	56.1561
09459	1038	7.65	50	15.19		116.2035	58.10175
09460	1038	5.45	66	12.53	23	68.2885	45.07041	22
09461	1038	7.3	50	12.94		94.462	47.231
09462	1038	7.15	50	10.02		71.643	35.8215
09463	1038	4.53	45	14.57		66.0021	29.700945
09464	1038	5.96	50	12.85		76.586	38.293
09465	1038	7.43	50	13.18		97.9274	48.9637
09466	1038	5.92	60	12.86		76.1312	45.67872
09467	1038	7.34	50	15.61		114.5774	57.2887
09468	1038	5.37	50	16.5		88.605	44.3025
09469	1038	3.14	40	14.13		44.3682	17.74728
09470	1038	11.17	45	11.33		126.5561	56.950245
09471	1038	5.36	50	13.11		70.2696	35.1348
09472	1038	8.3	55	13.08		108.564	59.7102
09473	1038	7.08	55	11.58		81.9864	45.09252
09474	1038	6.24	55	14.04		87.6096	48.18528
09475	1038	8.55	50	11.49		98.2395	49.11975
09476	1038	7.05	50	11.79		83.1195	41.55975
09477	1038	4.48	55	13.28		59.4944	32.72192
09478	1038	6.87	50	10.54		72.4098	36.2049
09479	1038	7.65	56	11.79		90.1935	50.50836
09480	1038	8.15	58	8.02		65.363	37.91054
09481	1038	9.05	40	12.06		109.143	43.6572
09482	1038	10.19	40	10.56		107.6064	43.04256
09483	1038	9.12	50	10.78		98.3136	49.1568
09484	1038	7.33	40	10.22		74.9126	29.96504
09485	1038	5.99	55	11.48		68.7652	37.82086
09486	1038	5.46	50	15.5		84.63	42.315
09487	1038	8.63	45	10.03		86.5589	38.951505
09488	1038	2.58	45	12.04		31.0632	13.97844
09489	1038	6.17	45	12.09		74.5953	33.567885
09490	1038	6.86	45	12.85		88.151	39.66795
09491	1038	7.58	40	14.26		108.0908	43.23632
09492	1038	5.94	40	14.88		88.3872	35.35488
09493	1038	5.47	40	16.17		88.4499	35.37996
09494	1038	3.73	45	19.32		72.0636	32.42862
09495	1038	5.22	50	17.75		92.655	46.3275
09496	1038	5.66	50	13.18		74.5988	37.2994
09497	1038	7.58	55	14.7		111.426	61.2843
09498	1038	5.2	50	13.76		71.552	35.776
09499	1038	7.73	50	13.92		107.6016	53.8008
09500	1038	5.95	50	13		77.35	38.675
09501	1038	4.16	50	15.86		65.9776	32.9888
09502	1038	5.29	46	16.94		89.6126	41.221796
09503	1038	5.24	45	21.52		112.7648	50.74416
09504	1038	5.5	45	17.89		98.395	44.27775
09505	1038	4.42	69	17.98		79.4716	54.835404
09506	1038	3.75	50	18.51		69.4125	34.70625
09507	1038	2.96	45	19.54		57.8384	26.02728
09508	1038								1061	168	238	250	277	25	15	161	41
09509	1039	7.94	73	12.31		97.7414	71.351222
09510	1039	8.21	72	14.95		122.7395	88.37244
09511	1039	7.71	70	14.55		112.1805	78.52635
09512	1039	9.25	69	15.99		147.9075	102.056175
09513	1039	7.15	70	18.86		134.849	94.3943
09514	1039	9.3	76	16.36		152.148	115.63248
09515	1039	6.23	72	10.93		68.0939	49.027608
09516	1039	7.5	70	10.19		76.425	53.4975
09517	1039	7.75	67	8.84		68.51	45.9017
09518	1039	9.67	58	9.31		90.0277	52.216066
09519	1039	8.91	71	11.13		99.1683	70.409493
09520	1039	8.2	69	11.41		93.562	64.55778
09521	1039	7.91	69	5.28		41.7648	28.817712
09522	1039	7.02	68	9.01		63.2502	43.010136
09523	1039	8.04	71	14.56		117.0624	83.114304
09524	1039	8.54	50	4.45		38.003	19.0015
09525	1039	7.38	75	12.52		92.3976	69.2982
09526	1039	8.78	70	12.65		111.067	77.7469
09527	1039	8.15	69	8.45		68.8675	47.518575
09528	1039	7.11	76	9.65		68.6115	52.14474
09529	1039	7.3	72	6.69		48.837	35.16264
09530	1039	8.56	60	6.58		56.3248	33.79488
09531	1039	8.02	62	11.15		89.423	55.44226
09532	1039	5.2	60	6.86		35.672	21.4032
09533	1039	7.23	60	8.88		64.2024	38.52144
09534	1039	6.72	67	10.11		67.9392	45.519264
09535	1039	9.18	60	10.39		95.3802	57.22812
09536	1039	7.25	57	8.08		58.58	33.3906
09537	1039	8.27	60	13.47		111.3969	66.83814
09538	1039	6.5	69	6.81		44.265	30.54285
09539	1039	5.92	68	8.79		52.0368	35.385024
09540	1039	8.46	68	11.81		99.9126	67.940568
09541	1039	5.93	63	8.45		50.1085	31.568355
09542	1039	8.5	69	11.78		100.13	69.0897
09543	1039	8.06	63	10.71		86.3226	54.383238
09544	1039	8.41	68	11.11		93.4351	63.535868
09545	1039	6.44	67	8.47		54.5468	36.546356
09546	1039	8.56	63	12.98		111.1088	69.998544
09547	1039	8.33	67	11.66		97.1278	65.075626
09548	1039	4.92	67	12.58		61.8936	41.468712
09549	1039	8.75	65	12.28		107.45	69.8425
09550	1039	8.36	70	14.75		123.31	86.317
09551	1039	8.56	68	15.04		128.7424	87.544832
09552	1039	7.18	67	18.27		131.1786	87.889662
09553	1039	9.22	65	4.53		41.7666	27.14829
09554	1039	7.11	65	13.57		96.4827	62.713755
09555	1039	7.6	69	10.82		82.232	56.74008
09556	1039	3.83	63	10.72		41.0576	25.866288
09557	1039	8.87	68	14.84		131.6308	89.508944
09558	1039	8.98	69	12.71		114.1358	78.753702
09559	1039	7.41	63	12.44		92.1804	58.073652
09560	1039	6	63	8.68		52.08	32.8104
09561	1039	9.46	65	13.04		123.3584	80.18296
09562	1039	8.05	62	11.01		88.6305	54.95091
09563	1039	6.52	67	11.56		75.3712	50.498704
09564	1039	8.12	66	15.52		126.0224	83.174784
09565	1039	6.97	69	10.89		75.9033	52.373277
09566	1039	5.36	62	8.95		47.972	29.74264
09567	1039	5.5	61	11.34		62.37	38.0457
09568	1039	4.36	59	9.83		42.8588	25.286692
09569	1039	7.73	61	10.42		80.5466	49.133426
09570	1039	11.68	58	7.34		85.7312	49.724096
09571	1039	7.91	55	9.31		73.6421	40.503155
09572	1039	12.46	57	10.61		132.2006	75.354342
09573	1039	8.23	45	8.62		70.9426	31.92417
09574	1039	9.56	50	8.32		79.5392	39.7696
09575	1039	7.04	40	5.89		41.4656	16.58624
09576	1039	8.3	60	11.22		93.126	55.8756
09577	1039	7.55	58	7.96		60.098	34.85684
09578	1039	6.14	60	11.59		71.1626	42.69756
09579	1039	6.9	56	14.61		100.809	56.45304
09580	1039	6.33	60	12.78		80.8974	48.53844
09581	1039	8.04	53	15.2		122.208	64.77024
09582	1039	5.07	70	10.28		52.1196	36.48372
09583	1039	8.63	69	11.54		99.5902	68.717238
09584	1039	5.51	66	11.26		62.0426	40.948116
09585	1039	6.59	45	11.21		73.8739	33.243255
09586	1039	6.48	68	12.65		81.972	55.74096
09587	1039	7.21	67	10.75		77.5075	51.930025	36
09588	1039	5.81	68	9.72	14.2	56.4732	38.401776	33
09589	1039	3.66	48	7.04		25.7664	12.367872
09590	1039	8.54	65	13.41	23.1	114.5214	74.43891	46
09591	1039	7.22	42	6.36		45.9192	19.286064
09592	1039	6.69	66	14.12	13.2	94.4628	62.345448	36
09593	1039	8.21	65	10.95		89.8995	58.434675	36
09594	1039	7.77	65	10.55		81.9735	53.282775	37
09595	1039	7.78	67	11.1		86.358	57.85986	32
09596	1039	7.99	54	10.93		87.3307	47.158578
09597	1039	7.34	69	5.23	16.4	38.3882	26.487858	46
09598	1039	7.93	67	8.74		69.3082	46.436494	30
09599	1039	6.53	50	5.72		37.3516	18.6758
09600	1039	6.94	50	9.81		68.0814	34.0407
09601	1039	8.13	65	11.47	12.5	93.2511	60.613215	30
09602	1039	6.03	53	7.8		47.034	24.92802
09603	1039	9.05	67	9.4		85.07	56.9969	42
09604	1039	7.1	56	8.21		58.291	32.64296
09605	1039	8.23	47	11.47		94.3981	44.367107
09606	1039	8.27	50	8.01		66.2427	33.12135
09607	1039	9.04	57	8.29		74.9416	42.716712
09608	1039	9.49	67	10.32		97.9368	65.617656	40
09609	1039	8.62	65	10.01		86.2862	56.08603	46
09610	1039	9.24	65	9.31	13.5	86.0244	55.91586	50
09611	1039	10.28	67	10.99		112.9772	75.694724	40
09612	1039	9.24	68	9.29		85.8396	58.370928	42
09613	1039	9.33	66	11.49		107.2017	70.753122	33
09614	1039	9.32	55	9.93		92.5476	50.90118
09615	1039	10.03	65	12.21		122.4663	79.603095	37
09616	1039	7.94	50	8.18		64.9492	32.4746
09617	1039	8.71	54	11.24		97.9004	52.866216
09618	1039	10.05	53	11.75		118.0875	62.586375
09619	1039	9.31	69	13.04	16.8	121.4024	83.767656	50
09620	1039	7.72	50	8.99		69.4028	34.7014
09621	1039	11.04	70	13.86		153.0144	107.11008	35
09622	1039	7.17	65	9.05		64.8885	42.177525	35
09623	1039	9.63	50	9.48		91.2924	45.6462
09624	1039	8.78	57	13.3		116.774	66.56118
09625	1039	9.5	58	11.66		110.77	64.2466
09626	1039	6.88	67	9.48		65.2224	43.699008	20
09627	1039	9.75	62	15.75		153.5625	95.20875
09628	1039	5.76	65	7.99	15.3	46.0224	29.91456	25
09629	1039	8.22	66	15.88		130.5336	86.152176	37
09630	1039	9.16	55	12.7		116.332	63.9826
09631	1039	7.73	65	16.04		123.9892	80.59298	46
09632	1039	6.99	50	7.76		54.2424	27.1212
09633	1039	8.46	54	15.31		129.5226	69.942204
09634	1039	6.84	54	10.32		70.5888	38.117952
09635	1039	8.42	65	12.85		108.197	70.32805	35
09636	1039	5.26	45	7.7		40.502	18.2259
09637	1039	9.54	66	14.62	15.6	139.4748	92.053368	20
09638	1039	6.91	55	11.94		82.5054	45.37797
09639	1039	8.07	65	11.28		91.0296	59.16924	38
09640	1039	8.6	65	11.66		100.276	65.1794	30
09641	1039	7.59	50	15.94		120.9846	60.4923
09642	1039	8.75	52	14.73		128.8875	67.0215
09643	1039	8.54	50	8.39		71.6506	35.8253
09644	1039	7.78	66	20.26	14.7	157.6228	104.031048	35
09645	1039	8.09	62	19.84		160.5056	99.513472
09646	1039	5.67	57	20.18		114.4206	65.219742
09647	1039	10.27	45	19.17		196.8759	88.594155
09648	1039								968	162	222	238	279	23	16	161	37
09649	1040	10.84	60	15.53		168.3452	101.00712
09650	1040	8.72	55	12.77		111.3544	61.24492
09651	1040	10.63	69	13.87		147.4381	101.732289
09652	1040	8.74	58	11.35		99.199	57.53542
09653	1040	10.91	60	11.13		121.4283	72.85698
09654	1040	7.89	68	10.66		84.1074	57.193032
09655	1040	8.47	60	10.06		85.2082	51.12492
09656	1040	9.03	63	17.95		162.0885	102.115755
09657	1040	11	50	12.19		134.09	67.045
09658	1040	10.41	52	14.94		155.5254	80.873208
09659	1040	16.45	55	10.72		176.344	96.9892
09660	1040	10.13	50	9.79		99.1727	49.58635
09661	1040	6.44	69	10.8		69.552	47.99088
09662	1040	9.8	68	11.47		112.406	76.43608
09663	1040	9.25	70	8.82		81.585	57.1095
09664	1040	8.72	74	8.08		70.4576	52.138624
09665	1040	9.66	70	7.11		68.6826	48.07782
09666	1040	6.98	67	8.17		57.0266	38.207822
09667	1040	9.7	72	10.7		103.79	74.7288
09668	1040	10	57	15.17		151.7	86.469
09669	1040	11.76	67	15.46		181.8096	121.812432
09670	1040	11.8	58	9.6		113.28	65.7024
09671	1040	9.89	60	11.22		110.9658	66.57948
09672	1040	7	75	10.9		76.3	57.225
09673	1040	8.17	69	11.22		91.6674	63.250506
09674	1040	8.33	60	17.91		149.1903	89.51418
09675	1040	9.72	73	11.1		107.892	78.76116
09676	1040	8.96	69	11.43		102.4128	70.664832
09677	1040	6.22	73	11.33		70.4726	51.444998
09678	1040	8.39	72	18.92		158.7388	114.291936
09679	1040	7.57	83	18.92		143.2244	118.876252
09680	1040	7.91	60	12.99		102.7509	61.65054
09681	1040	13.98	71	7.23		101.0754	71.763534
09682	1040	11.34	70	9.55		108.297	75.8079
09683	1040	8.64	60	12.09		104.4576	62.67456
09684	1040	8.5	50	8.39		71.315	35.6575
09685	1040	6.76	50	11.41		77.1316	38.5658
09686	1040	7.28	70	12		87.36	61.152
09687	1040	8.28	55	12.66		104.8248	57.65364
09688	1040	6.23	70	22.85		142.3555	99.64885
09689	1040	6.46	62	18.21		117.6366	72.934692
09690	1040	8.48	68	12.75		108.12	73.5216
09691	1040	12.75	62	11.11		141.6525	87.82455
09692	1040	8.7	71	12.78		111.186	78.94206
09693	1040	8.64	68	17.38		150.1632	102.110976
09694	1040	11.4	62	8.76		99.864	61.91568
09695	1040	11.47	60	12.32		141.3104	84.78624
09696	1040	9.51	67	18.11		172.2261	115.391487
09697	1040	10.89	55	13.94		151.8066	83.49363
09698	1040	9.68	60	19.21		185.9528	111.57168
09699	1040	8.4	65	14.18		119.112	77.4228
09700	1040	10.51	57	15.97		167.8447	95.671479
09701	1040	8.14	67	9.44		76.8416	51.483872
09702	1040	8.3	64	8.9		73.87	47.2768
09703	1040	9.23	64	10.66		98.3918	62.970752
09704	1040	11.5	62	17.52		201.48	124.9176
09705	1040	6.49	62	11.95		77.5555	48.08441
09706	1040	8.1	62	14.33		116.073	71.96526
09707	1040	11.3	62	10.78		121.814	75.52468
09708	1040	14.82	42	16.02		237.4164	99.714888
09709	1040	11.53	47	13.93		160.6129	75.488063
09710	1040	12.83	56	16.26		208.6158	116.824848
09711	1040	8.21	40	8.29		68.0609	27.22436
09712	1040	8.75	70	15		131.25	91.875
09713	1040	11.51	48	18.49		212.8199	102.153552
09714	1040	7.93	52	13.52		107.2136	55.751072
09715	1040	10.11	67	10.85		109.6935	73.494645
09716	1040	7.14	50	20.46		146.0844	73.0422
09717	1040	7.18	70	9.63		69.1434	48.40038
09718	1040	9	66	17.25		155.25	102.465
09719	1040	9.79	45	7.79		76.2641	34.318845
09720	1040	8.16	50	10.52		85.8432	42.9216
09721	1040	7.11	69	10.22		72.6642	50.138298
09722	1040	8.5	69	18.47		156.995	108.32655
09723	1040	7.86	65	10.63		83.5518	54.30867
09724	1040	10	50	11.75		117.5	58.75
09725	1040	9.81	67	12.9	11	126.549	84.78783	40
09726	1040	9.35	56	7.63		71.3405	39.95068
09727	1040	9.89	66	12.54		124.0206	81.853596	36
09728	1040	8.63	66	8.32		71.8016	47.389056	40
09729	1040	10.33	68	14.52		149.9916	101.994288	33
09730	1040	10.6	60	14.86		157.516	94.5096
09731	1040	11.75	40	14.7		172.725	69.09
09732	1040	10.46	55	15.14		158.3644	87.10042
09733	1040	11.41	45	6.76		77.1316	34.70922
09734	1040	10.96	60	11.81		129.4376	77.66256
09735	1040	9.87	67	14.67	14.7	144.7929	97.011243	22
09736	1040	9.1	54	10.59		96.369	52.03926
09737	1040	12.13	50	17.05		206.8165	103.40825
09738	1040	9.78	51	10.88		106.4064	54.267264
09739	1040	9.56	40	9.39		89.7684	35.90736
09740	1040	11.43	45	12.69		145.0467	65.271015
09741	1040	9.8	68	8.62	15.2	84.476	57.44368	40
09742	1040	8.33	48	8.3		69.139	33.18672
09743	1040	10.08	57	12.26		123.5808	70.441056
09744	1040	11.46	68	13.88		159.0648	108.164064	38
09745	1040	11.36	68	10.52		119.5072	81.264896	34
09746	1040	7.02	65	14.76		103.6152	67.34988	44
09747	1040	9.97	58	10.63		105.9811	61.469038
09748	1040	10.23	67	11.51	15.1	117.7473	78.890691	37
09749	1040	13.11	50	9.41		123.3651	61.68255
09750	1040	17.86	40	11.71		209.1406	83.65624
09751	1040	12.41	67	9.39		116.5299	78.075033	38
09752	1040	9.52	67	9.58		91.2016	61.105072	42
09753	1040	11.12	66	11.12		123.6544	81.611904	40
09754	1040	10.84	66	9.92		107.5328	70.971648	38
09755	1040	9.94	67	12.86	15.7	127.8284	85.645028	40
09756	1040	9.91	65	10.5		104.055	67.63575	42
09757	1040	10	50	13.48		134.8	67.4
09758	1040	9.6	60	13.65		131.04	78.624
09759	1040	7.5	58	14.11		105.825	61.3785
09760	1040	10.28	65	13.91		142.9948	92.94662	22
09761	1040	12.58	40	18.1		227.698	91.0792
09762	1040	9.68	68	13.19		127.6792	86.821856	30
09763	1040	10.04	45	15.14		152.0056	68.40252
09764	1040	10.94	40	13.66		149.4404	59.77616
09765	1040	12.78	65	10.43	19.5	133.2954	86.64201	35
09766	1040	10.86	62	17.44		189.3984	117.427008
09767	1040	12.88	50	10.96		141.1648	70.5824
09768	1040	9.9	71	8.38		82.962	58.90302	37
09769	1040	9.17	45	12.86		117.9262	53.06679
09770	1040	15.07	60	14.85		223.7895	134.2737
09771	1040	8.4	60	14.16		118.944	71.3664
09772	1040	14.26	62	12.12		172.8312	107.155344
09773	1040	8.64	58	16.11		139.1904	80.730432
09774	1040	10.6	67	12.34	13.8	130.804	87.63868	35
09775	1040	8.82	65	13.92		122.7744	79.80336	37
09776	1040	10.3	68	17.82		183.546	124.81128	36
09777	1040	10.43	68	15.02		156.6586	106.527848	22
09778	1040	8.71	65	14.6		127.166	82.6579	38
09779	1040	8.35	65	16.19		135.1865	87.871225	25
09780	1040	12.48	58	13.42		167.4816	97.139328
09781	1040	10.04	67	13.31	14.8	133.6324	89.533708	38
09782	1040	7.91	57	11.21		88.6711	50.542527
09783	1040	7.33	58	12.94		94.8502	55.013116
09784	1040	13.95	50	8.53		118.9935	59.49675
09785	1040	9.95	65	14.42	14.4	143.479	93.26135	20
09786	1040	10.61	62	14.7		155.967	96.69954
09787	1040	10.98	57	11.38		124.9524	71.222868
09788	1040	9.27	55	7.39		68.5053	37.677915
09789	1040	10.66	50	15.35		163.631	81.8155
09790	1040	7.87	60	6.82		53.6734	32.20404
09791	1040	10.45	64	14.23		148.7035	95.17024
09792	1040	10.7	68	17.45	16.7	186.715	126.9662	29
09793	1040	7.91	60	14.41		113.9831	68.38986
09794	1040	10.97	62	19		208.43	129.2266
09795	1040	8.48	67	10.51		89.1248	59.713616	37
09796	1040	8.5	52	7.03		59.755	31.0726	37
09797	1040	9.11	62	9.34		85.0874	52.754188
09798	1040	7.96	65	12.22		97.2712	63.22628	35
09799	1040	7.38	65	10.53	14.7	77.7114	50.51241	50
09800	1040	10.02	69	10.61		106.3122	73.355418	40
09801	1040	8.79	69	18.05		158.6595	109.475055	30
09802	1040	11.3	67	12.26		138.538	92.82046	37
09803	1040	10.03	62	8.96		89.8688	55.718656
09804	1040	6.02	67	17.31		104.2062	69.818154	30
09805	1040	10.18	67	13.94		141.9092	95.079164	40
09806	1040	9.5	69	13.31		126.445	87.24705	37
09807	1040	7.5	67	13.47	10.9	101.025	67.68675	37
09808	1040	8.49	70	13.27		112.6623	78.86361	39
09809	1040	17.05	68	14.33		244.3265	166.14202	15
09810	1040	6.98	60	15.83		110.4934	66.29604
09811	1040	6.97	60	18.54		129.2238	77.53428
09812	1040	6.32	58	26.61		168.1752	97.541616
09813	1040	6.83	57	16.49		112.6267	64.197219
09814	1040	8.33	55	17.14		142.7762	78.52691
09815	1040	9.27	40	17.49		162.1323	64.85292
09816	1040	6.41	52	21.23		136.0843	70.763836
09817	1040	2.47	45	15.76		38.9272	17.51724
09818	1040	4.14	55	20.45		84.663	46.56465
09819	1040	5.35	50	19.61		104.9135	52.45675
09820	1040								1107	168	220	246	276	25	12	164	41.5
09821	1041	5.78	70	21.28		122.9984	86.09888
09822	1041	12.28	69	14.19		174.2532	120.234708
09823	1041	10.28	70	14.18		145.7704	102.03928
09824	1041	9.44	76	20.95		197.768	150.30368
09825	1041	8.5	72	17.81		151.385	108.9972
09826	1041	8.37	72	20.2		169.074	121.73328
09827	1041	17.34	70	12.07		209.2938	146.50566
09828	1041	11.69	76	14.1		164.829	125.27004
09829	1041	10.09	70	21.84		220.3656	154.25592
09830	1041	7.31	70	21.49		157.0919	109.96433
09831	1041	8.97	73	15.63		140.2011	102.346803
09832	1041	7.72	73	17.99		138.8828	101.384444
09833	1041	7.89	72	18.97		149.6733	107.764776
09834	1041	8.13	73	17.96		146.0148	106.590804
09835	1041	7.16	76	22.74		162.8184	123.741984
09836	1041	5.99	74	20.02		119.9198	88.740652
09837	1041	6.58	70	16.8		110.544	77.3808
09838	1041	8.8	70	15.98		140.624	98.4368
09839	1041	8.47	70	16.65		141.0255	98.71785
09840	1041	12.11	73	18.82		227.9102	166.374446
09841	1041	7.7	71	19.56		150.612	106.93452
09842	1041	6.6	73	16.85		111.21	81.1833
09843	1041	13.57	72	8.71		118.1947	85.100184
09844	1041	7.84	75	17.46		136.8864	102.6648
09845	1041	8.27	70	23.76		196.4952	137.54664
09846	1041	10.09	72	23.12		233.2808	167.962176
09847	1041	12.16	75	13.14		159.7824	119.8368
09848	1041	6.93	74	24.4		169.092	125.12808
09849	1041	9.36	73	20.96		196.1856	143.215488
09850	1041	9.47	73	15.09		142.9023	104.318679
09851	1041	8.05	70	22.86		184.023	128.8161
09852	1041	11.78	68	20.18		237.7204	161.649872
09853	1041	10.68	71	21.76		232.3968	165.001728
09854	1041	8.37	75	20.58		172.2546	129.19095
09855	1041	8.75	76	15.96		139.65	106.134
09856	1041	10.55	75	22.88		241.384	181.038
09857	1041	9.23	70	20.95		193.3685	135.35795
09858	1041	7.34	75	19.25		141.295	105.97125
09859	1041	6.16	69	21.09		129.9144	89.640936
09860	1041	7.88	68	21.79		171.7052	116.759536
09861	1041	7.99	69	21.21		169.4679	116.932851
09862	1041	8.66	65	20.46		177.1836	115.16934
09863	1041	9.75	67	17.36		169.26	113.4042
09864	1041	6.33	71	20.24		128.1192	90.964632
09865	1041	10.08	70	17.34		174.7872	122.35104
09866	1041	12.4	69	18.2		225.68	155.7192
09867	1041	9.12	65	17.22		157.0464	102.08016
09868	1041	7.57	65	19.39		146.7823	95.408495
09869	1041	7.84	66	19.24		150.8416	99.555456
09870	1041	13	63	18.6		241.8	152.334
09871	1041	6.38	66	18.04		115.0952	75.962832
09872	1041	16.63	60	17.36		288.6968	173.21808
09873	1041	8.16	67	21.68		176.9088	118.528896
09874	1041	6.58	62	16.07		105.7406	65.559172
09875	1041	7.94	69	16.83		133.6302	92.204838
09876	1041	12.9	65	14.67		189.243	123.00795
09877	1041	8.86	62	19.55		173.213	107.39206
09878	1041	9.03	65	17.14		154.7742	100.60323
09879	1041	8.55	62	20.05		171.4275	106.28505
09880	1041	10.44	73	17.21		179.6724	131.160852
09881	1041	9.23	68	16.32		150.6336	102.430848
09882	1041	8.59	68	19.43		166.9037	113.494516
09883	1041	3.67	67	10.41		38.2047	25.597149
09884	1041	13.13	56	15.87		208.3731	116.688936
09885	1041	8.82	59	9.88		87.1416	51.413544
09886	1041	5.59	59	16.08		89.8872	53.033448
09887	1041	9.33	63	16.87		157.3971	99.160173
09888	1041	8.12	62	18.42		149.5704	92.733648
09889	1041	9.46	60	10.07		95.2622	57.15732
09890	1041	9.5	42	20.94		198.93	83.5506
09891	1041	7.74	62	19.12		147.9888	91.753056
09892	1041	7.72	57	19.78		152.7016	87.039912
09893	1041	10.6	50	20.83		220.798	110.399
09894	1041	9.96	57	9.1		90.636	51.66252
09895	1041	7.47	50	17.88		133.5636	66.7818
09896	1041	9.03	69	18.32		165.4296	114.146424
09897	1041	11.76	60	16.8		197.568	118.5408
09898	1041	8.75	66	19.88		173.95	114.807
09899	1041	7.27	66	20.12		146.2724	96.539784
09900	1041	9.68	65	18.68		180.8224	117.53456
09901	1041	9.05	55	11.46		103.713	57.04215
09902	1041	7.61	67	20.25		154.1025	103.248675
09903	1041	10.47	65	19.23		201.3381	130.869765
09904	1041	8.36	67	20.05		167.618	112.30406
09905	1041	8.36	68	18.2	12.5	152.152	103.46336	20
09906	1041	7.63	70	22	17.6	167.86	117.502	37
09907	1041	7.26	65	19.26		139.8276	90.88794	35
09908	1041	8.22	65	22.3		183.306	119.1489	20
09909	1041	7.26	65	19.22		139.5372	90.69918	39
09910	1041	9.35	66	19.84		185.504	122.43264	27
09911	1041	6.73	67	21.12		142.1376	95.232192	36
09912	1041	8.45	66	16.66		140.777	92.91282	36
09913	1041	7.22	67	18.19		131.3318	87.992306	37
09914	1041	8.25	68	19.05		157.1625	106.8705	38
09915	1041	8.06	70	12.08		97.3648	68.15536	38
09916	1041	7.78	69	17.64	15.7	137.2392	94.695048	38
09917	1041	8.64	70	12.53	15.2	108.2592	75.78144	42
09918	1041	8.07	68	15.69		126.6183	86.100444	35
09919	1041	9.6	66	18.99		182.304	120.32064	35
09920	1041	9.03	70	18.81		169.8543	118.89801	33
09921	1041	7.89	68	19.22		151.6458	103.119144	43
09922	1041	10.46	67	19.32		202.0872	135.398424	27
09923	1041	9.46	66	22.66	17.9	214.3636	141.479976	30
09924	1041	10.9	50	18.66		203.394	101.697
09925	1041	8.52	57	20.78		177.0456	100.915992
09926	1041	8.39	69	14.8		124.172	85.67868	36
09927	1041	7.53	65	18.12		136.4436	88.68834	45
09928	1041	7.2	67	20.11		144.792	97.01064	42
09929	1041	10.4	66	20.38		211.952	139.88832	25
09930	1041	8.66	66	20.41		176.7506	116.655396	27
09931	1041	7.28	67	18.93		137.8104	92.332968	42
09932	1041	7.61	67	22.56	15.3	171.6816	115.026672	43
09933	1041	9.16	65	19.45		178.162	115.8053	28
09934	1041	7.72	65	15.35		118.502	77.0263	45
09935	1041	8.14	68	22.07		179.6498	122.161864	40
09936	1041	7.48	65	18.08		135.2384	87.90496	39
09937	1041	7.54	66	19.43		146.5022	96.691452	35
09938	1041	7.3	66	17.39		126.947	83.78502	40
09939	1041	8.6	67	20.91		179.826	120.48342	42
09940	1041	9.3	67	19.19		178.467	119.57289	37
09941	1041	8.04	66	20.05	18.6	161.202	106.39332	35
09942	1041	9.49	69	18.91		179.4559	123.824571	33
09943	1041	9.96	68	20.51		204.2796	138.910128	35
09944	1041	8.42	68	22.76		191.6392	130.314656	35
09945	1041	7.88	65	13.03		102.6764	66.73966	39
09946	1041	8.02	56	20.2		162.004	90.72224	39
09947	1041	7.47	51	12.91		96.4377	49.183227
09948	1041	7.93	66	22.99		182.3107	120.325062	20
09949	1041	7.43	60	19.35		143.7705	86.2623	20
09950	1041	9.91	60	17.93		177.6863	106.61178
09951	1041	8.83	52	21.64		191.0812	99.362224
09952	1041	8.63	60	13.92		120.1296	72.07776
09953	1041	8.91	60	23.22		206.8902	124.13412
09954	1041	8.47	67	23.25	15.2	196.9275	131.941425	30
09955	1041	9.82	55	10.63	15.2	104.3866	57.41263	30
09956	1041	7.49	72	19.71		147.6279	106.292088	36
09957	1041	6.6	67	16.19		106.854	71.59218	35
09958	1041	7.98	60	20.26		161.6748	97.00488
09959	1041	8.16	65	14.46		117.9936	76.69584	40
09960	1041	6.76	68	16.18		109.3768	74.376224	36
09961	1041	10.1	56	14.59		147.359	82.52104
09962	1041	6.06	67	12.98		78.6588	52.701396	35
09963	1041	13.4	58	12.95		173.53	100.6474
09964	1041	9.21	62	20.98		193.2258	119.799996
09965	1041	7.99	65	15.35		122.6465	79.720225	39
09966	1041	9.22	68	20.07	12.3	185.0454	125.830872	38
09967	1041	7.49	67	18.72		140.2128	93.942576	36
09968	1041	8.46	67	20.69		175.0374	117.275058	32
09969	1041	7.51	69	22		165.22	114.0018	36
09970	1041	7.55	58	17.54		132.427	76.80766
09971	1041	12.96	62	19.98		258.9408	160.543296
09972	1041	8.38	67	16.33		136.8454	91.686418	40
09973	1041	7.58	68	17.94		135.9852	92.469936	35
09974	1041	9.37	60	19.24		180.2788	108.16728
09975	1041	9.4	54	18.17		170.798	92.23092
09976	1041	8.06	60	19.46		156.8476	94.10856
09977	1041	7.91	60	20.25		160.1775	96.1065
09978	1041	9.9	60	16.23		160.677	96.4062
09979	1041	7.64	68	19.32	12.7	147.6048	100.371264	42
09980	1041	7.94	66	19.84		157.5296	103.969536	36
09981	1041	7.29	73	20.44	13.4	149.0076	108.775548	36
09982	1041	8.14	69	20.22	12.2	164.5908	113.567652	43
09983	1041	7.97	70	19.21		153.1037	107.17259	43
09984	1041	7.68	70	16.91		129.8688	90.90816
09985	1041	6.56	70	20.35		133.496	93.4472
09986	1041	10.97	65	20.26		222.2522	144.46393	32
09987	1041	7.09	67	19.07		135.2063	90.588221	30
09988	1041	8.14	67	13.58		110.5412	74.062604	40
09989	1041	7.37	62	15.81		116.5197	72.242214
09990	1041	10.34	68	21.76	12.9	224.9984	152.998912	30
09991	1041	9.2	67	19.55		179.86	120.5062	28
09992	1041	9.7	60	19.32		187.404	112.4424
09993	1041	6.61	62	14.33		94.7213	58.727206
09994	1041	8.82	56	18.86		166.3452	93.153312
09995	1041	6.92	69	17.02		117.7784	81.267096	40
09996	1041	8.47	70	21.24		179.9028	125.93196	35
09997	1041	11.18	62	22.71		253.8978	157.416636
09998	1041	6.66	67	18.15		120.879	80.98893	35
09999	1041	5.4	67	19.96	16.3	107.784	72.21528	36
10000	1041	5.9	67	19.35		114.165	76.49055	37
10001	1041	7.21	62	17.65		127.2565	78.89903
10002	1041	8.6	60	23.32		200.552	120.3312
10003	1041	14.9	67	18.62		277.438	185.88346	20
10004	1041	5.43	60	23.51		127.6593	76.59558
10005	1041	5.95	70	21.99		130.8405	91.58835	37
10006	1041	5.88	65	17.61		103.5468	67.30542	37
10007	1041	5.93	66	16.04		95.1172	62.777352	40
10008	1041	5.92	50	17.54		103.8368	51.9184
10009	1041	6.44	65	18.9	11.4	121.716	79.1154	20
10010	1041	11.96	62	15.43		184.5428	114.416536
10011	1041	7.39	65	12.83		94.8137	61.628905	35
10012	1041	6.82	66	24.44		166.6808	110.009328	35
10013	1041	8.8	63	16.44		144.672	91.14336
10014	1041	8.33	58	17.49		145.6917	84.501186
10015	1041	7.09	66	16.71		118.4739	78.192774	40
10016	1041	6.82	69	17.31	12.1	118.0542	81.457398	36
10017	1041	6.97	67	17.09		119.1173	79.808591	38
10018	1041	11	47	23.71		260.81	122.5807
10019	1041	7.33	67	20.26		148.5058	99.498886	35
10020	1041	6.08	62	22.08		134.2464	83.232768
10021	1041	7.36	70	23.34	13.3	171.7824	120.24768	36
10022	1041	7.45	70	17.95	15.4	133.7275	93.60925	36
10023	1041	6.51	65	19.06		124.0806	80.65239	38
10024	1041	6.48	60	20.37		131.9976	79.19856
10025	1041	5.86	60	23.28		136.4208	81.85248
10026	1041	10.51	62	18.38		193.1738	119.767756
10027	1041	5.97	67	22.03	12.8	131.5191	88.117797	40
10028	1041	6.37	67	22.26		141.7962	95.003454	40
10029	1041	8.04	60	21.11		169.7244	101.83464
10030	1041	7.13	65	22.76		162.2788	105.48122	29
10031	1041	6.95	70	21.24		147.618	103.3326	25
10032	1041	6.09	67	23.6		143.724	96.29508	35
10033	1041	7.82	66	27.14		212.2348	140.074968	28
10034	1041	7.72	68	24.63		190.1436	129.297648	27
10035	1041	8.35	68	19.19		160.2365	108.96082	40
10036	1041	7.45	68	20.72	15.8	154.364	104.96752	43
10037	1041	7.44	65	18.16		135.1104	87.82176	38
10038	1041	10.65	58	20.73		220.7745	128.04921
10039	1041	7.39	68	23.63		174.6257	118.745476	25
10040	1041	8.24	65	19.14		157.7136	102.51384	36
10041	1041	9.2	62	23.65		217.58	134.8996
10042	1041	6.56	67	16.06		105.3536	70.586912	20
10043	1041	9.5	62	23.44		222.68	138.0616
10044	1041	8.95	60	29.88		267.426	160.4556
10045	1041	8.26	58	21.67		178.9942	103.816636
10046	1041	9.9	60	24.65		244.035	146.421
10047	1041	5.97	55	21.08		125.8476	69.21618
10048	1041	8.16	67	20.69	15.9	168.8304	113.116368	17
10049	1041	9.19	55	21.56		198.1364	108.97502
10050	1041	7.98	63	21.91		174.8418	110.150334
10051	1041	9.14	65	24.25		221.645	144.06925	20
10052	1041	9.7	60	18.67		181.099	108.6594
10053	1041	11.14	55	22.43		249.8702	137.42861
10054	1041	7.83	60	18.61		145.7163	87.42978
10055	1041	8.51	60	20.22		172.0722	103.24332
10056	1041	8.21	62	21.31		174.9551	108.472162
10057	1041	7.06	65	22.06		155.7436	101.23334	27
10058	1041	9.15	65	22.85		209.0775	135.900375
10059	1041	9.04	63	20.77		187.7608	118.289304
10060	1041	7.43	58	19.72		146.5196	84.981368
10061	1041	7.77	65	20.64	13.6	160.3728	104.24232	38
10062	1041	8.17	65	19.72		161.1124	104.72306	39
10063	1041	8.53	62	19.9		169.747	105.24314
10064	1041	7.29	66	18.68	14.5	136.1772	89.876952	35
10065	1041	8.82	50	20.43		180.1926	90.0963
10066	1041	8.02	50	18.61		149.2522	74.6261
10067	1041	9.49	60	20.36		193.2164	115.92984
10068	1041	7.92	60	18.77		148.6584	89.19504
10069	1041	9.31	55	22.39		208.4509	114.647995
10070	1041	12.01	50	22.92		275.2692	137.6346
10071	1041	12.25	50	18.99		232.6275	116.31375
10072	1041	8.8	58	18.6		163.68	94.9344
10073	1041	8.67	55	18.25		158.2275	87.025125
10074	1041	6.52	70	22.61	18.5	147.4172	103.19204	38
10075	1041	7.82	60	19.27		150.6914	90.41484
10076	1041	8.18	60	22.2		181.596	108.9576
10077	1041	9.38	58	17.05		159.929	92.75882
10078	1041	4.43	50	20.27		89.7961	44.89805
10079	1041	7.95	60	22.03		175.1385	105.0831
10080	1041	7.75	50	16.37		126.8675	63.43375
10081	1041	7.19	58	24.19		173.9261	100.877138
10082	1041	7.1	55	20.89		148.319	81.57545
10083	1041	9.15	60	23.65		216.3975	129.8385
10084	1041	8.67	69	21.15	14.8	183.3705	126.525645	28
10085	1041	9.22	60	19.07		175.8254	105.49524
10086	1041	10.3	50	15.02		154.706	77.353
10087	1041	5.3	50	22.39		118.667	59.3335
10088	1041	6.81	55	20.89		142.2609	78.243495
10089	1041	9.05	65	15.73	11.9	142.3565	92.531725	22
10090	1041	10.3	60	21.53		221.759	133.0554
10091	1041	6.62	55	19.67		130.2154	71.61847
10092	1041	11.93	52	11.25		134.2125	69.7905
10093	1041	5.27	50	15.48		81.5796	40.7898
10094	1041	7.33	60	19.77		144.9141	86.94846
10095	1041	5.25	58	26.25		137.8125	79.93125
10096	1041	5.9	65	25.95		153.105	99.51825	24
10097	1041	3.75	58	24.6		92.25	53.505
10098	1041	6.38	55	30.33		193.5054	106.42797
10099	1041	5.32	58	29.19		155.2908	90.068664
10100	1041	7.63	62	17.83		136.0429	84.346598
10101	1041	6.12	55	23.85		145.962	80.2791
10102	1041	6.25	60	13.43		83.9375	50.3625
10103	1041	7.06	68	24.09	15.5	170.0754	115.651272	37
10104	1041	6.71	60	24.57		164.8647	98.91882
10105	1041	5.95	65	20.33		120.9635	78.626275
10106	1041	6.8	60	16.65		113.22	67.932
10107	1041	6.15	60	21.26		130.749	78.4494
10108	1041	6.05	55	22.72		137.456	75.6008
10109	1041	5.79	66	22.22		128.6538	84.911508	35
10110	1041	6.14	52	25.13		154.2982	80.235064
10111	1041	8.36	65	25.22		210.8392	137.04548
10112	1041	8.07	56	25.14		202.8798	113.612688
10113	1041	5.03	50	18.6		93.558	46.779
10114	1041	8.82	52	15.38		135.6516	70.538832
10115	1041	4.75	55	22.74		108.015	59.40825
10116	1041	6.08	60	25.1		152.608	91.5648
10117	1041	7.25	60	23.84		172.84	103.704
10118	1041	4.95	60	25.14		124.443	74.6658
10119	1041	7.11	60	25.27		179.6697	107.80182
10120	1041	5.48	65	23.59		129.2732	84.02758
10121	1041	6.96	65	25.18	19.5	175.2528	113.91432	37
10122	1041	8	58	23.54		188.32	109.2256
10123	1041	7.97	57	25.9		206.423	117.66111
10124	1041	5.7	65	23.18		132.126	85.8819
10125	1041	8	59	18.62		148.96	87.8864
10126	1041	6.5	60	21.28		138.32	82.992	35
10127	1041	5.13	65	26		133.38	86.697	32
10128	1041	2.75	65	22.04		60.61	39.3965
10129	1041	6.87	59	24.05		165.2235	97.481865
10130	1041	7.54	60	20.2		152.308	91.3848
10131	1041	7.06	65	25.33		178.8298	116.23937
10132	1041	8.05	65	22.27		179.2735	116.527775	26
10133	1041	7.69	60	23.23		178.6387	107.18322
10134	1041	5.45	50	24.15		131.6175	65.80875
10135	1041	5.83	62	24.25		141.3775	87.65405
10136	1041	7.18	60	27.83		199.8194	119.89164
10137	1041	6.66	65	26.52		176.6232	114.80508
10138	1041	6.43	65	24.91		160.1713	104.111345
10139	1041								1071	174	230	245	274	25	14	161	49.5
10140	1042	7.95	73	14.75		117.2625	85.601625
10141	1042	6.18	68	6.65		41.097	27.94596
10142	1042	6.38	69	14.32		91.3616	63.039504
10143	1042	6.49	70	11.1		72.039	50.4273
10144	1042	7.4	70	11.16		82.584	57.8088
10145	1042	8.12	73	8.48		68.8576	50.266048
10146	1042	9.01	69	16.26		146.5026	101.086794
10147	1042	11.3	70	10.2		115.26	80.682
10148	1042	6.75	67	9.1		61.425	41.15475
10149	1042	7.06	71	10.61		74.9066	53.183686
10150	1042	9.75	68	10.18		99.255	67.4934
10151	1042	6.82	70	10.15		69.223	48.4561
10152	1042	6.18	77	13.14		81.2052	62.528004
10153	1042	6.71	70	11.96		80.2516	56.17612
10154	1042	7.53	78	12.86		96.8358	75.531924
10155	1042	6.41	72	13.29		85.1889	61.336008
10156	1042	6.36	70	11.4		72.504	50.7528
10157	1042	9.71	71	7.49		72.7279	51.636809
10158	1042	7.6	72	13.08		99.408	71.57376
10159	1042	7.52	75	14.87		111.8224	83.8668
10160	1042	7.54	73	11.7		88.218	64.39914
10161	1042	6.68	77	11.66		77.8888	59.974376
10162	1042	9.2	75	11.48		105.616	79.212
10163	1042	7.52	72	14.62		109.9424	79.158528
10164	1042	6.78	69	14.96		101.4288	69.985872
10165	1042	8.78	73	14.99		131.6122	96.076906
10166	1042	6.17	78	11.95		73.7315	57.51057
10167	1042	13.79	73	9.07		125.0753	91.304969
10168	1042	7.02	80	13.36		93.7872	75.02976
10169	1042	7.1	75	14.83		105.293	78.96975
10170	1042	6.57	76	16.89		110.9673	84.335148
10171	1042	6.85	75	18.15		124.3275	93.245625
10172	1042	7.24	73	12.51		90.5724	66.117852
10173	1042	6.84	75	15.33		104.8572	78.6429
10174	1042	5.03	70	7.88		39.6364	27.74548
10175	1042	6.01	70	14.63		87.9263	61.54841
10176	1042	6.28	70	17.13		107.5764	75.30348
10177	1042	9.49	73	12.98		123.1802	89.921546
10178	1042	5.91	73	19.42		114.7722	83.783706
10179	1042	6.83	70	20.43		139.5369	97.67583
10180	1042	6.58	66	13.67		89.9486	59.366076
10181	1042	5.99	66	13.45		80.5655	53.17323
10182	1042	5.39	73	8.78		47.3242	34.546666
10183	1042	7	76	14.91		104.37	79.3212
10184	1042	7.33	71	18.79		137.7307	97.788797
10185	1042	5.6	70	16.64		93.184	65.2288
10186	1042	10.73	70	13.75		147.5375	103.27625
10187	1042	6.67	70	13.32		88.8444	62.19108
10188	1042	6.87	68	13.73		94.3251	64.141068
10189	1042	7.1	71	11.98		85.058	60.39118
10190	1042	6.48	72	17.32		112.2336	80.808192
10191	1042	9.16	70	15.28		139.9648	97.97536
10192	1042	6.97	70	11.24		78.3428	54.83996
10193	1042	7.01	63	10.22		71.6422	45.134586
10194	1042	7.77	75	15.21		118.1817	88.636275
10195	1042	3.61	69	6.12		22.0932	15.244308
10196	1042	7.22	69	13.12		94.7264	65.361216
10197	1042	8.48	69	11.57		98.1136	67.698384
10198	1042	6.94	69	12.58		87.3052	60.240588
10199	1042	7.44	70	8.11		60.3384	42.23688
10200	1042	5.88	67	5.7		33.516	22.45572
10201	1042	6.93	72	17.92		124.1856	89.413632
10202	1042	6.97	67	13.38		93.2586	62.483262
10203	1042	7.79	70	13.08		101.8932	71.32524
10204	1042	7.42	69	10.33		76.6486	52.887534
10205	1042	5.92	69	14.11		83.5312	57.636528
10206	1042	8.43	70	17.09		144.0687	100.84809
10207	1042	5.81	66	16.66		96.7946	63.884436
10208	1042	5.5	67	20.68		113.74	76.2058
10209	1042	4.86	62	24.67		119.8962	74.335644
10210	1042	4.57	62	26.86		122.7502	76.105124
10211	1042	2.2	46	23.4		51.48	23.6808
10212	1042	3.21	59	22.64		72.6744	42.877896
10213	1042	3.91	68	20.17		78.8647	53.627996
10214	1042	3.99	53	18.87		75.2913	39.904389
10215	1042	4.47	73	14.92		66.6924	48.685452
10216	1042	4.76	70	17.38		82.7288	57.91016
10217	1042	5.4	66	12		64.8	42.768
10218	1042	5.04	67	14.39		72.5256	48.592152
10219	1042	9.69	57	11.37		110.1753	62.799921
10220	1042	10.25	66	12.85		131.7125	86.93025
10221	1042	4.68	65	13.87		64.9116	42.19254
10222	1042	5.65	73	14.93		84.3545	61.578785
10223	1042	6.69	72	10.14	15.9	67.8366	48.842352	40
10224	1042	5.17	72	9.82		50.7694	36.553968	40
10225	1042	5.98	67	20.3		121.394	81.33398	37
10226	1042	8.05	51	7.52		60.536	30.87336
10227	1042	5.89	65	12.96		76.3344	49.61736	43
10228	1042	4.61	57	6.38		29.4118	16.764726
10229	1042	5.51	66	17.34		95.5434	63.058644	37
10230	1042	6.97	65	15.57		108.5229	70.539885	45
10231	1042	5.71	69	12.99		74.1729	51.179301	30
10232	1042	8.25	69	19.66	19.4	162.195	111.91455	43
10233	1042	5.8	66	10.8		62.64	41.3424	50
10234	1042	4.97	70	14.94		74.2518	51.97626	36
10235	1042	5.84	67	14.81		86.4904	57.948568	36
10236	1042	6.05	68	11.11		67.2155	45.70654	48
10237	1042	5.19	67	13.42	19.2	69.6498	46.665366	40
10238	1042	4.55	45	7.22		32.851	14.78295
10239	1042	6.84	66	14.94		102.1896	67.445136	37
10240	1042	7.46	67	14.94		111.4524	74.673108	38
10241	1042	5.28	69	14.81		78.1968	53.955792	41
10242	1042	6.16	67	11.81		72.7496	48.742232	42
10243	1042	6.76	70	16.18		109.3768	76.56376	43
10244	1042	8.99	68	9.44		84.8656	57.708608	42
10245	1042	8.13	66	16.19		131.6247	86.872302	45
10246	1042	4.68	67	13.79	15.1	64.5372	43.239924	40
10247	1042	8.18	70	17.44		142.6592	99.86144	45
10248	1042	6.58	66	9.35		61.523	40.60518	50
10249	1042	8.01	66	16.58		132.8058	87.651828	46
10250	1042	8.57	68	11.28		96.6696	65.735328	45
10251	1042	7.24	66	12.82		92.8168	61.259088	43
10252	1042	9.14	67	16.44		150.2616	100.675272	45
10253	1042	9.37	70	14.17		132.7729	92.94103	50
10254	1042	8.51	67	10.69		90.9719	60.951173	45
10255	1042	8.25	68	10.72	19.4	88.44	60.1392	39
10256	1042	6.55	67	11.52		75.456	50.55552	45
10257	1042	4.8	40	9.3		44.64	17.856
10258	1042	11.55	59	12.18		140.679	83.00061
10259	1042	9.25	67	12.53		115.9025	77.654675	43
10260	1042	8.89	56	10.38		92.2782	51.675792
10261	1042	6.83	67	17.12		116.9296	78.342832	50
10262	1042	6.76	73	13.93		94.1668	68.741764	50
10263	1042	9.21	65	14.63	16	134.7423	87.582495	38
10264	1042	8.25	67	20.72		170.94	114.5298	45
10265	1042	11.78	67	11.67		137.4726	92.106642	40
10266	1042	7.81	68	16.55		129.2555	87.89374	40
10267	1042	8.25	68	16.75		138.1875	93.9675	58
10268	1042	6.36	67	13.76		87.5136	58.634112	41
10269	1042	9.89	53	7.77		76.8453	40.728009
10270	1042	5.14	67	15.09		77.5626	51.966942	38
10271	1042	7.75	69	14.19	11.7	109.9725	75.881025	42
10272	1042	7.34	67	12.7		93.218	62.45606	40
10273	1042	8.14	65	13.89		113.0646	73.49199	42
10274	1042	8.69	67	15.88		137.9972	92.458124	50
10275	1042	10.61	69	13.43		142.4923	98.319687	48
10276	1042	9.56	68	12.08		115.4848	78.529664	50
10277	1042	7.15	50	7.66		54.769	27.3845
10278	1042	7.2	67	19		136.8	91.656	40
10279	1042	7.14	67	10.33		73.7562	49.416654	36
10280	1042	8.66	65	16.86	16.5	146.0076	94.90494	50
10281	1042	8.45	73	10.3		87.035	63.53555	45
10282	1042	10.89	68	9.53		103.7817	70.571556	35
10283	1042	8.28	55	14.24		117.9072	64.84896
10284	1042	9.96	67	13.07		130.1772	87.218724	55
10285	1042	8.09	62	11.65		94.2485	58.43407
10286	1042	7.91	65	10.57		83.6087	54.345655	46
10287	1042	7.72	60	15.66		120.8952	72.53712
10288	1042	8.67	62	15.13		131.1771	81.329802
10289	1042	5.76	68	9.27	13.2	53.3952	36.308736	42
10290	1042	8.38	50	10.35		86.733	43.3665
10291	1042	6.8	67	12.38	15.3	84.184	56.40328	43
10292	1042	9.76	62	8.77		85.5952	53.069024
10293	1042	10.15	67	15.09		153.1635	102.619545	44
10294	1042	6.73	67	14.17		95.3641	63.893947	36
10295	1042	4.75	67	15.22		72.295	48.43765	40
10296	1042	6.75	68	18.92		127.71	86.8428	50
10297	1042	5.78	67	13.78		79.6484	53.364428	30
10298	1042	7.19	75	22.05	15.3	158.5395	118.904625	33
10299	1042	3.96	56	14.1		55.836	31.26816
10300	1042	4.04	65	18.75		75.75	49.2375	35
10301	1042	3.73	58	23.36		87.1328	50.537024
10302	1042	6.47	58	25.3		163.691	94.94078
10303	1042	3.1	60	21.3		66.03	39.618
10304	1042	3.3	70	20.4		67.32	47.124	35
10305	1042	4.42	67	31.71		140.1582	93.905994	35
10306	1042	3.73	55	25.95		96.7935	53.236425
10307	1042	3.65	45	28.32		103.368	46.5156
10308	1042	3.6	45	4.09		14.724	6.6258
10309	1042								854	165	208	229	279	23.5	11	161	40.5
10310	1042								775	168	207	225	255	25	12	164	38
10311	1043	6.83	69	7.68		52.4544	36.193536
10312	1043	7.22	67	6.49		46.8578	31.394726
10313	1043	9.73	69	9.6		93.408	64.45152
10314	1043	6.87	60	7.65		52.5555	31.5333
10315	1043	6.55	65	7.1		46.505	30.22825
10316	1043	9.13	70	14.07		128.4591	89.92137
10317	1043	7.47	55	10.32		77.0904	42.39972
10318	1043	9.71	67	10.72		104.0912	69.741104
10319	1043	8.26	60	4.11		33.9486	20.36916
10320	1043	7.88	60	8.81		69.4228	41.65368
10321	1043	9.25	57	9.63		89.0775	50.774175
10322	1043	8.67	70	7.64		66.2388	46.36716
10323	1043	8.62	69	12.14		104.6468	72.206292
10324	1043	7.79	57	5.22		40.6638	23.178366
10325	1043	6.02	50	11.76		70.7952	35.3976
10326	1043	8.21	67	9.17		75.2857	50.441419
10327	1043	6.61	67	10.2		67.422	45.17274
10328	1043	7.07	50	5.92		41.8544	20.9272
10329	1043	7.73	60	6.63		51.2499	30.74994
10330	1043	8.71	66	8.24		71.7704	47.368464
10331	1043	7.4	67	4.25		31.45	21.0715
10332	1043	8.02	57	7.62		61.1124	34.834068
10333	1043	7.72	61	5.33		41.1476	25.100036
10334	1043	7.56	60	6.57		49.6692	29.80152
10335	1043	7.54	60	6.41		48.3314	28.99884
10336	1043	9.31	57	11.18		104.0858	59.328906
10337	1043	8.66	71	13.68		118.4688	84.112848
10338	1043	7.21	60	7.54		54.3634	32.61804
10339	1043	8.19	57	7.53		61.6707	35.152299
10340	1043	8.41	67	12.4		104.284	69.87028
10341	1043	6.03	68	7.64		46.0692	31.327056
10342	1043	7.66	70	6.59		50.4794	35.33558
10343	1043	7.66	68	11.49		88.0134	59.849112
10344	1043	6.8	63	7.37		50.116	31.57308
10345	1043	8.19	60	11.17		91.4823	54.88938
10346	1043	7.62	45	6.63		50.5206	22.73427
10347	1043	7.15	55	6.99		49.9785	27.488175
10348	1043	7.14	50	5.56		39.6984	19.8492
10349	1043	9.25	56	11.77		108.8725	60.9686
10350	1043	6.99	62	6.42		44.8758	27.822996
10351	1043	6.42	61	5.84		37.4928	22.870608
10352	1043	9.23	67	9.87		91.1001	61.037067
10353	1043	5.07	60	7.33		37.1631	22.29786
10354	1043	6.56	58	7.37		48.3472	28.041376
10355	1043	7.4	56	5.88		43.512	24.36672
10356	1043	8.85	56	10.47		92.6595	51.88932
10357	1043	5.73	60	5.68		32.5464	19.52784
10358	1043	7.93	50	4.97		39.4121	19.70605
10359	1043	8.11	56	5.16		41.8476	23.434656
10360	1043	7.24	58	5.96		43.1504	25.027232
10361	1043	7.44	55	6.71		49.9224	27.45732
10362	1043	7.68	58	6.23		47.8464	27.750912
10363	1043	6.58	60	3.41		22.4378	13.46268
10364	1043	8	57	7.22		57.76	32.9232
10365	1043	10.58	45	12.93		136.7994	61.55973
10366	1043	7.68	52	9.56		73.4208	38.178816
10367	1043	6.61	50	7.51		49.6411	24.82055
10368	1043	7.12	54	8.46		60.2352	32.527008
10369	1043	6.97	60	6.99		48.7203	29.23218
10370	1043	8.23	65	8.58		70.6134	45.89871
10371	1043	8.72	55	6.16		53.7152	29.54336
10372	1043	7.91	42	6.18		48.8838	20.531196
10373	1043	7.45	65	12.26	12.5	91.337	59.36905	15
10374	1043	7.12	58	7		49.84	28.9072
10375	1043	9.33	54	12.44		116.0652	62.675208
10376	1043	5.79	55	6.88		39.8352	21.90936
10377	1043	5.25	47	6.37		33.4425	15.717975
10378	1043	6.38	45	11.29		72.0302	32.41359
10379	1043	8.13	54	10.58		86.0154	46.448316
10380	1043	6.43	48	13.44		86.4192	41.481216
10381	1043	6.92	50	8.95		61.934	30.967
10382	1043	7.18	40	5.52		39.6336	15.85344
10383	1043	6.28	50	6.81		42.7668	21.3834
10384	1043	6.25	40	7.45		46.5625	18.625
10385	1043	8.72	54	8.12		70.8064	38.235456
10386	1043	7	50	8.62		60.34	30.17
10387	1043	7.27	46	6.83		49.6541	22.840886
10388	1043	9.42	40	9.7		91.374	36.5496
10389	1043	6.94	48	5.4		37.476	17.98848
10390	1043	9.38	50	8.92		83.6696	41.8348
10391	1043	6.37	50	4.47		28.4739	14.23695
10392	1043	6.04	45	5.38		32.4952	14.62284
10393	1043								1190	173	250	257	296	25		170	44
10394	1292	5.06	63	7.56		38.2536	24.099768
10395	1292	7	70	7.09		49.63	34.741
10396	1292	5.59	76	11.28		63.0552	47.921952
10397	1292	5.07	69	9.24		46.8468	32.324292
10398	1292	5.86	68	8.13		47.6418	32.396424
10399	1292	6.56	58	8.98		58.9088	34.167104
10400	1292	6.88	60	8.42		57.9296	34.75776
10401	1292	4.84	62	10.3		49.852	30.90824
10402	1292	6.27	72	9.43		59.1261	42.570792
10403	1292	5.45	60	11.05		60.2225	36.1335
10404	1292	6.75	67	9.93		67.0275	44.908425
10405	1292	6.82	70	7.21		49.1722	34.42054
10406	1292	5.06	72	8.44		42.7064	30.748608
10407	1292	6.93	68	13.34		92.4462	62.863416
10408	1292	5.06	72	7.87		39.8222	28.671984
10409	1292	6.16	71	9.84		60.6144	43.036224
10410	1292	5.25	67	8.27		43.4175	29.089725
10411	1292	4.41	74	11.12		49.0392	36.289008
10412	1292	5.97	71	9.29		55.4613	39.377523
10413	1292	7.42	70	9.66		71.6772	50.17404
10414	1292	9.59	71	4.94		47.3746	33.635966
10415	1292	5.82	67	5.76		33.5232	22.460544
10416	1292	6.38	75	11.73		74.8374	56.12805
10417	1292	6.08	70	10.72		65.1776	45.62432
10418	1292	5.92	76	6.78		40.1376	30.504576
10419	1292	5.91	70	7.23		42.7293	29.91051
10420	1292	6.39	69	8.43		53.8677	37.168713
10421	1292	5.56	70	10.68		59.3808	41.56656
10422	1292	4.67	67	3.79		17.6993	11.858531
10423	1292	6.25	74	9.22		57.625	42.6425
10424	1292	5.01	68	9.51		47.6451	32.398668
10425	1292	4.48	63	7.35		32.928	20.74464
10426	1292	6.35	68	8.61		54.6735	37.17798
10427	1292	4.89	67	6.31		30.8559	20.673453
10428	1292	6.04	67	10.52		63.5408	42.572336
10429	1292	4.37	70	10.31		45.0547	31.53829
10430	1292	6.52	70	15.77		102.8204	71.97428
10431	1292	6.16	63	11.59		71.3944	44.978472
10432	1292	5.22	69	15.04		78.5088	54.171072
10433	1292	6.18	62	9.88		61.0584	37.856208
10434	1292	5.06	67	13.16		66.5896	44.615032
10435	1292	5.26	69	11.32		59.5432	41.084808
10436	1292	7.73	67	9.51		73.5123	49.253241
10437	1292	6.64	67	11.67		77.4888	51.917496
10438	1292	4.25	65	8.62		36.635	23.81275
10439	1292	4.65	70	9.98		46.407	32.4849
10440	1292	5.66	62	9.87		55.8642	34.635804
10441	1292	6.09	62	14.14		86.1126	53.389812
10442	1292	6.03	63	9.36		56.4408	35.557704
10443	1292	4.47	63	12.23		54.6681	34.440903
10444	1292	5.03	60	14.19		71.3757	42.82542
10445	1292	12.71	41	8.41		106.8911	43.825351
10446	1292	7.85	57	10.65		83.6025	47.653425
10447	1292	4.75	70	14.92		70.87	49.609
10448	1292	5.75	50	13.93		80.0975	40.04875
10449	1292	3.25	52	13.97		45.4025	23.6093
10450	1292	7.24	60	8.89		64.3636	38.61816
10451	1292	3.13	60	8.87		27.7631	16.65786
10452	1292	13.5	60	9.12		123.12	73.872
10453	1292	5.75	40	12.73		73.1975	29.279
10454	1292	4.31	60	8.92		38.4452	23.06712
10455	1292	6.56	68	12.62		82.7872	56.295296
10456	1292	4.99	70	6.81	14	33.9819	23.78733	40
10457	1292	6.4	70	10.28		65.792	46.0544	43
10458	1292	5.11	66	10.5		53.655	35.4123	36
10459	1292	7.55	50	8.92		67.346	33.673
10460	1292	5.5	50	12.55		69.025	34.5125
10461	1292	4.27	65	14.91		63.6657	41.382705	20
10462	1292	6.02	70	10.57		63.6314	44.54198
10463	1292	5.95	48	12.49		74.3155	35.67144
10464	1292	6.39	50	8.02		51.2478	25.6239
10465	1292	5.43	50	11.44		62.1192	31.0596
10466	1292	9.39	57	8.81		82.7259	47.153763
10467	1292	6.81	52	8.94		60.8814	31.658328
10468	1292	6.74	52	8.48		57.1552	29.720704
10469	1292	6.37	58	10.53		67.0761	38.904138
10470	1292	4.68	66	13.52	15.5	63.2736	41.760576	30
10471	1292	8.5	52	12.14		103.19	53.6588
10472	1292	5.55	48	6.45		35.7975	17.1828
10473	1292	6.25	48	9.02		56.375	27.06
10474	1292	6.9	65	12.9		89.01	57.8565	47
10475	1292	5.99	48	5.86		35.1014	16.848672
10476	1292	5.58	53	8.98		50.1084	26.557452
10477	1292	5.63	65	9.9		55.737	36.22905	40
10478	1292	6.2	53	9.04		56.048	29.70544
10479	1292	6.59	65	12.28	15.9	80.9252	52.60138	37
10480	1292	7.51	48	7.48		56.1748	26.963904
10481	1292	5.61	65	9.56		53.6316	34.86054	39
10482	1292	5.75	65	8.28		47.61	30.9465	46
10483	1292	4.22	67	12.33		52.0326	34.861842	39
10484	1292	7.27	50	7.44		54.0888	27.0444
10485	1292	6.46	67	10.8	16.8	69.768	46.74456	40
10486	1292	7.46	67	10.74		80.1204	53.680668	30
10487	1292	12.05	40	8.67		104.4735	41.7894
10488	1292	5.57	40	9.95		55.4215	22.1686
10489	1292	8.82	54	12.72		112.1904	60.582816
10490	1292	6.47	58	14.2		91.874	53.28692
10491	1292	5.44	60	9.83		53.4752	32.08512
10492	1292	5.68	55	8.75		49.7	27.335
10493	1292	5.67	55	14.54		82.4418	45.34299
10494	1292	4.82	40	6.8		32.776	13.1104
10495	1292	5.96	40	9.27		55.2492	22.09968
10496	1292	4.71	50	17.37		81.8127	40.90635
10497	1292	7.5	55	12.63		94.725	52.09875
10498	1292	6.72	50	11.92		80.1024	40.0512
10499	1292	4.11	67	13.85	15.2	56.9235	38.138745	36
10500	1292	4.48	58	8.43		37.7664	21.904512
10501	1292	5.66	55	11.52		65.2032	35.86176
10502	1292	4.69	50	11.48		53.8412	26.9206
10503	1292	6.43	68	19.71	14.2	126.7353	86.180004	20
10504	1292	4.87	58	15.24		74.2188	43.046904
10505	1292	4.12	68	18.07	13.1	74.4484	50.624912	20
10506	1292	6.42	50	20.36		130.7112	65.3556
10507	1292	4.83	62	20.24		97.7592	60.610704
10508	1292	4.55	67	20.87		94.9585	63.622195	28
10509	1292	6.92	59	8.59		59.4428	35.071252
10510	1292	4.6	58	13.53		62.238	36.09804
10511	1292	5.08	55	11.72		59.5376	32.74568
10512	1292	7.34	65	17.76	13.2	130.3584	84.73296	20
10513	1292	5.01	58	14.97		74.9997	43.499826
10514	1292	6.97	57	21.88		152.5036	86.927052
10515	1292	6.74	60	14.05		94.697	56.8182
10516	1292	6.33	63	13		82.29	51.8427
10517	1292	6.61	50	15.29		101.0669	50.53345
10518	1292	6.09	50	19.7		119.973	59.9865
10519	1292	6.12	63	11.39		69.7068	43.915284
10520	1292	6.32	68	12.08	14.4	76.3456	51.915008	30
10521	1292	4.68	60	17.5		81.9	49.14
10522	1292	4	60	13.04		52.16	31.296
10523	1292	5.94	58	15.83		94.0302	54.537516
10524	1292	4.2	52	14		58.8	30.576
10525	1292	3.5	50	19.73		69.055	34.5275
10526	1292	5.04	60	13.63		68.6952	41.21712
10527	1292	4.5	45	18.06		81.27	36.5715
10528	1292	6.75	55	11.96		80.73	44.4015
10529	1292	3.73	60	12.72		47.4456	28.46736
10530	1292	6.57	55	15.63		102.6891	56.479005
10531	1292	7.81	62	15.81		123.4761	76.555182
10532	1292	7.19	52	9.93		71.3967	37.126284
10533	1292	3.27	58	9.64		31.5228	18.283224
10534	1292	4.98	52	8.43		41.9814	21.830328
10535	1292	5.51	58	10.15		55.9265	32.43737
10536	1292	6.84	50	12.14		83.0376	41.5188
10537	1292	8	52	10.38		83.04	43.1808
10538	1292	5.16	50	13.92		71.8272	35.9136
10539	1292	5.99	55	13.48		80.7452	44.40986
10540	1292	6.7	55	13.79		92.393	50.81615
10541	1292	4.54	62	10.94		49.6676	30.793912
10542	1292	4.5	45	5.7		25.65	11.5425
10543	1292	6.66	45	11.46		76.3236	34.34562
10544	1292	4.13	50	13.54		55.9202	27.9601
10545	1292	3.91	40	13.9		54.349	21.7396
10546	1292	6.69	50	14.11		94.3959	47.19795
10547	1292	2.8	50	16.59		46.452	23.226
10548	1292	5.04	48	14.98		75.4992	36.239616
10549	1292								1054	167	230	253	288	24		159	45
10550	1044	2.62	73	17.34		45.4308	33.164484
10551	1044	5.91	71	20.58		121.6278	86.355738
10552	1044	4.89	73	20.18		98.6802	72.036546
10553	1044	4.79	71	21.36		102.3144	72.643224
10554	1044	2.63	73	14.85		39.0555	28.510515
10555	1044	6.05	73	19.95		120.6975	88.109175
10556	1044	5.43	71	25.19		136.7817	97.115007
10557	1044	3.75	73	18.02		67.575	49.32975
10558	1044	12.62	67	15.11		190.6882	127.761094
10559	1044	8.85	67	11.22		99.297	66.52899
10560	1044	9.13	70	12.13		110.7469	77.52283
10561	1044	9.97	75	16.27		162.2119	121.658925
10562	1044	11.87	73	17.72		210.3364	153.545572
10563	1044	8.03	73	20.9		167.827	122.51371
10564	1044	9.12	72	19.2		175.104	126.07488
10565	1044	8.5	71	18.32		155.72	110.5612
10566	1044	6.68	67	14.53		97.0604	65.030468
10567	1044	9.65	73	18.02		173.893	126.94189
10568	1044	8.98	72	18.25		163.885	117.9972
10569	1044	8.53	72	16.7		142.451	102.56472
10570	1044	7.35	71	17.83		131.0505	93.045855
10571	1044	8.74	73	15.95		139.403	101.76419
10572	1044	8.91	69	12.37		110.2167	76.049523
10573	1044	10.72	71	21.19		227.1568	161.281328
10574	1044	11.91	73	21.44		255.3504	186.405792
10575	1044	8.51	70	19.16		163.0516	114.13612
10576	1044	9.9	71	18.11		179.289	127.29519
10577	1044	11.95	60	26.48		316.436	189.8616
10578	1044	7.74	73	16.51		127.7874	93.284802
10579	1044	12.35	70	23.53		290.5955	203.41685
10580	1044	9.96	70	25.04		249.3984	174.57888
10581	1044	8.75	63	21.63		189.2625	119.235375
10582	1044	6.26	73	20.31		127.1406	92.812638
10583	1044	9.75	73	26.52		258.57	188.7561
10584	1044	8.17	70	22.17		181.1289	126.79023
10585	1044	7.77	80	21.22		164.8794	131.90352
10586	1044	8.75	63	28.6		250.25	157.6575
10587	1044	7.9	69	23.68		187.072	129.07968
10588	1044	5.85	60	21.37		125.0145	75.0087
10589	1044	8.55	70	27.05		231.2775	161.89425
10590	1044	7.94	60	24.21		192.2274	115.33644
10591	1044	8.98	55	21.08		189.2984	104.11412
10592	1044	8.81	56	21.19		186.6839	104.542984
10593	1044	5.2	50	17.32		90.064	45.032
10594	1044	7.53	55	20.12		151.5036	83.32698
10595	1044	8.71	40	17.73		154.4283	61.77132
10596	1044	9.36	50	14.75		138.06	69.03
10597	1044	9.56	61	18.29		174.8524	106.659964
10598	1044	7.02	50	11.69		82.0638	41.0319
10599	1044	9.84	56	17.97		176.8248	99.021888
10600	1044	6.76	59	10.9		73.684	43.47356
10601	1044	7.82	58	9.01		70.4582	40.865756
10602	1044	6.9	50	18.58		128.202	64.101
10603	1044	12.75	60	17.52		223.38	134.028
10604	1044	9.8	62	17.79		174.342	108.09204
10605	1044	11.77	61	14.57		171.4889	104.608229
10606	1044	9.59	62	15.22		145.9598	90.495076
10607	1044	10.29	61	20.99		215.9871	131.752131
10608	1044	8.52	62	14.55		123.966	76.85892
10609	1044	10.48	45	27.75		290.82	130.869
10610	1044	6.69	43	25.96		173.6724	74.679132
10611	1044	2.23	50	23.71		52.8733	26.43665
10612	1044	6.04	42	29.58		178.6632	75.038544
10613	1044	5.61	53	27.1		152.031	80.57643
10614	1044	7.68	40	30.03		230.6304	92.25216
10615	1044	7.61	53	27.84		211.8624	112.287072
10616	1044	10.83	41	24.26		262.7358	107.721678
10617	1044	9.17	66	21.89		200.7313	132.482658
10618	1044	5.73	50	14.69		84.1737	42.08685
10619	1044	8.13	63	30.43	19.2	247.3959	155.859417	36
10620	1044	2.03	50	26.42		53.6326	26.8163
10621	1044	7.01	67	25.33		177.5633	118.967411	37
10622	1044	2	50	21.24		42.48	21.24
10623	1044	6.94	65	32.84		227.9096	148.14124	39
10624	1044	3.58	66	31.21		111.7318	73.742988	36
10625	1044	3.72	67	27.79		103.3788	69.263796	36
10626	1044	5	68	31.68	15.2	158.4	107.712	39
10627	1044	5.28	66	35.36		186.7008	123.222528	35
10628	1044	5.02	68	33.31		167.2162	113.707016	35
10629	1044	5.8	65	36.73		213.034	138.4721	36
10630	1044	5.76	66	27.24		156.9024	103.555584	37
10631	1044	7.35	66	28.61	16	210.2835	138.78711	37
10632	1044	8.31	67	26.08		216.7248	145.205616	37
10633	1044	6.69	66	24.33		162.7677	107.426682	36
10634	1044	5.47	66	21.5		117.605	77.6193	40
10635	1044	6.87	67	23.41		160.8267	107.753889	37
10636	1044	9.6	66	30.95		297.12	196.0992	35
10637	1044	7.79	68	25.9	13.5	201.761	137.19748	34
10638	1044	6.8	50	21.07		143.276	71.638
10639	1044	6.12	67	23.48		143.6976	96.277392	39
10640	1044	7.79	67	21.51		167.5629	112.267143	36
10641	1044	7.29	65	17.55		127.9395	83.160675	40
10642	1044	8.91	65	17.21		153.3411	99.671715	37
10643	1044	8.86	50	15.79		139.8994	69.9497
10644	1044	8.74	43	14.61		127.6914	54.907302
10645	1044	6.9	65	14.07	14.4	97.083	63.10395	40
10646	1044	11.67	65	16.04		187.1868	121.67142	48
10647	1044	10.93	45	16.04		175.3172	78.89274
10648	1044	10.22	65	17.79		181.8138	118.17897	40
10649	1044	11.3	66	15.5		175.15	115.599	40
10650	1044	9.38	65	16.98		159.2724	103.52706	38
10651	1044	9.66	48	25.38		245.1708	117.681984
10652	1044	12.96	65	12.77		165.4992	107.57448	40
10653	1044	12.33	54	19.44		239.6952	129.435408
10654	1044	9.94	60	17.51		174.0494	104.42964
10655	1044	11.24	60	20.75		233.23	139.938
10656	1044	10.24	45	19.34		198.0416	89.11872
10657	1044	9.77	50	19.94		194.8138	97.4069
10658	1044	11.77	55	21.56		253.7612	139.56866
10659	1044	7.38	50	13.14		96.9732	48.4866
10660	1044	9.39	58	20.31		190.7109	110.612322
10661	1044	8.68	60	20.28		176.0304	105.61824
10662	1044	9.68	50	23.75		229.9	114.95
10663	1044	10.5	43	23.21		243.705	104.79315
10664	1044	7.13	45	12.94		92.2622	41.51799
10665	1044	9.5	47	21.58		205.01	96.3547
10666	1044	11.38	50	24.35		277.103	138.5515
10667	1044	4.95	45	10.69		52.9155	23.811975
10668	1044	10.2	45	17.05		173.91	78.2595
10669	1044	13.01	56	24.61		320.1761	179.298616
10670	1044	9.09	50	21.96		199.6164	99.8082
10671	1044	11.86	55	21.4		253.804	139.5922
10672	1044	9.46	42	22.46		212.4716	89.238072
10673	1044	10.83	50	19.01		205.8783	102.93915
10674	1044	9.55	58	23.13		220.8915	128.11707
10675	1044	5.18	54	29.21		151.3078	81.706212
10676	1044	5.73	65	34.36	15.7	196.8828	127.97382	25
10677	1044	4.56	60	27.38		124.8528	74.91168
10678	1044	5.33	64	28.92		154.1436	98.651904
10679	1044	8.31	66	25.95	15.5	215.6445	142.32537	30
10680	1044	5.41	50	21.11		114.2051	57.10255
10681	1044	11.61	62	22.77		264.3597	163.903014
10682	1044	11.91	50	24.65		293.5815	146.79075
10683	1044	8.77	60	26.08		228.7216	137.23296
10684	1044	8.12	60	23.93		194.3116	116.58696
10685	1044	13.5	60	23.81		321.435	192.861
10686	1044	12.37	45	27.28		337.4536	151.85412
10687	1044	11.46	50	22.16		253.9536	126.9768
10688	1044	11.41	60	21.6		246.456	147.8736
10689	1044	10.38	62	10.09		104.7342	64.935204
10690	1044	8.64	62	20.96		181.0944	112.278528
10691	1044	11.88	60	24.55		291.654	174.9924
10692	1044	7.9	60	17.96		141.884	85.1304
10693	1044	9.86	55	23.58		232.4988	127.87434
10694	1044	7.61	65	23.14	10.7	176.0954	114.46201	32
10695	1044	8.93	55	21.62		193.0666	106.18663
10696	1044	11.2	55	23.15		259.28	142.604
10697	1044	13.32	60	20.97		279.3204	167.59224
10698	1044	11.78	66	24.36		286.9608	189.394128	34
10699	1044	9.91	60	22.29		220.8939	132.53634
10700	1044	9.79	60	22.41		219.3939	131.63634
10701	1044	10.08	65	23.03	12.5	232.1424	150.89256	33
10702	1044	9.28	55	17.24		159.9872	87.99296
10703	1044	8.72	58	17.94		156.4368	90.733344
10704	1044	8.95	50	22.28		199.406	99.703
10705	1044	10.84	50	10.48		113.6032	56.8016
10706	1044	9.38	60	16.84		157.9592	94.77552
10707	1044	8.55	40	20.76		177.498	70.9992
10708	1044	7.75	62	12.61		97.7275	60.59105
10709	1044	8.83	50	20.53		181.2799	90.63995
10710	1044	8.09	62	21.43		173.3687	107.488594
10711	1044	7.6	55	16.8		127.68	70.224
10712	1044	8.61	50	25		215.25	107.625
10713	1044	7.07	62	22.52		159.2164	98.714168
10714	1044	7.68	50	19.72		151.4496	75.7248
10715	1044	6.66	50	22.77		151.6482	75.8241
10716	1044	10.91	55	21.75		237.2925	130.510875
10717	1044	7.06	60	13.75		97.075	58.245
10718	1044	8.81	45	23.84		210.0304	94.51368
10719	1044	9.22	50	19.75		182.095	91.0475
10720	1044	8.96	55	13.54		121.3184	66.72512
10721	1044	9.62	50	18.58		178.7396	89.3698
10722	1044	7.15	45	17.39		124.3385	55.952325
10723	1044	8.15	50	16.93		137.9795	68.98975
10724	1044	8.28	58	18.25		151.11	87.6438
10725	1044	10.1	50	21.82		220.382	110.191
10726	1044	9.39	50	10.91		102.4449	51.22245
10727	1044	7.7	50	19.11		147.147	73.5735
10728	1044	7.37	50	27.65		203.7805	101.89025
10729	1044								1050	175	232	248	283	24	13	168	50.5
10730	1044								1077	177	228	252	289	25	12	175	51.5
10731	1045	5.96	74	19.47		116.0412	85.870488
10732	1045	6.07	76	21.87		132.7509	100.890684
10733	1045	8.65	75	19.56		169.194	126.8955
10734	1045	6.32	76	20.03		126.5896	96.208096
10735	1045	7.76	75	9.51		73.7976	55.3482
10736	1045	3.78	72	17.07		64.5246	46.457712
10737	1045	8.18	63	18.44		150.8392	95.028696
10738	1045	8.14	81	20.06		163.2884	132.263604
10739	1045	5.76	80	15.3		88.128	70.5024
10740	1045	5.5	70	20.01		110.055	77.0385
10741	1045	4.71	75	14.27		67.2117	50.408775
10742	1045	7.55	75	14.47		109.2485	81.936375
10743	1045	7.1	70	21.05		149.455	104.6185
10744	1045	9.19	60	12.08		111.0152	66.60912
10745	1045	5.54	50	4.41		24.4314	12.2157
10746	1045	6	78	17.3		103.8	80.964
10747	1045	5.07	57	7.32		37.1124	21.154068
10748	1045	9.24	71	7.36		68.0064	48.284544
10749	1045	8.07	69	9.33		75.2931	51.952239
10750	1045	8.16	72	22.39		182.7024	131.545728
10751	1045	9.9	75	19.21		190.179	142.63425
10752	1045	10.17	78	16.93		172.1781	134.298918
10753	1045	8.83	74	23.81		210.2423	155.579302
10754	1045	7.11	73	20.24		143.9064	105.051672
10755	1045	6.46	71	16.69		107.8174	76.550354
10756	1045	5.08	80	18.94		96.2152	76.97216
10757	1045	6.45	72	19.17		123.6465	89.02548
10758	1045	7.8	76	16.41		127.998	97.27848
10759	1045	7.32	76	11.37		83.2284	63.253584
10760	1045	6.21	71	16.16		100.3536	71.251056
10761	1045	7.48	76	14.63		109.4324	83.168624
10762	1045	7.92	75	23.66		187.3872	140.5404
10763	1045	9.3	73	15.27		142.011	103.66803
10764	1045	5.38	72	18.69		100.5522	72.397584
10765	1045	10.11	68	19.78		199.9758	135.983544
10766	1045	10.1	70	26.25		265.125	185.5875
10767	1045	7.46	75	21.86		163.0756	122.3067
10768	1045	11.45	76	12.71		145.5295	110.60242
10769	1045	5.47	73	22.99		125.7553	91.801369
10770	1045	8	67	19.62		156.96	105.1632
10771	1045	6.47	68	13.03		84.3041	57.326788
10772	1045	5.99	68	18.14		108.6586	73.887848
10773	1045	9.68	67	19.33		187.1144	125.366648
10774	1045	6.32	72	10.97		69.3304	49.917888
10775	1045	8.09	67	20.88		168.9192	113.175864
10776	1045	5.64	68	21.3		120.132	81.68976
10777	1045	7.5	70	21.89		164.175	114.9225
10778	1045	10.25	68	14.39		147.4975	100.2983
10779	1045	7.65	63	19.063		145.83195	91.8741285
10780	1045	7.44	70	12.37		92.0328	64.42296
10781	1045	8.17	66	14.07		114.9519	75.868254
10782	1045	9.72	68	19.21		186.7212	126.970416
10783	1045	9.24	62	17.91		165.4884	102.602808
10784	1045	10.22	68	14.47		147.8834	100.560712
10785	1045	8.24	62	14.2		117.008	72.54496
10786	1045	12.55	62	8.45		106.0475	65.74945
10787	1045	6.19	68	16.49		102.0731	69.409708
10788	1045	8.82	71	13.32		117.4824	83.412504
10789	1045	4.89	71	13.82		67.5798	47.981658
10790	1045	9.18	67	14.82		136.0476	91.151892
10791	1045	7.15	62	15.87		113.4705	70.35171
10792	1045	10.04	68	12.68		127.3072	86.568896
10793	1045	6.84	68	16.47		112.6548	76.605264
10794	1045	8.82	67	14.74		130.0068	87.104556
10795	1045	7.92	65	13.88		109.9296	71.45424
10796	1045	9.5	67	18.79		178.505	119.59835
10797	1045	7.8	68	22.92		178.776	121.56768
10798	1045	11.91	56	14.22		169.3602	94.841712
10799	1045	8.94	68	15.79		141.1626	95.990568
10800	1045	5.52	65	6.17		34.0584	22.13796
10801	1045	6.62	72	19.38		128.2956	92.372832
10802	1045	6.43	67	19.83		127.5069	85.429623
10803	1045	6.63	70	16.66		110.4558	77.31906
10804	1045	7.11	66	18.76		133.3836	88.033176
10805	1045	7.28	72	15.79		114.9512	82.764864
10806	1045	6	73	17.42		104.52	76.2996
10807	1045	5.99	70	13.65		81.7635	57.23445
10808	1045	7.48	69	17.35		129.778	89.54682
10809	1045	6.06	74	13.59		82.3554	60.942996
10810	1045	6.11	72	16.94	20.3	103.5034	74.522448	53
10811	1045	6.7	78	20.92		140.164	109.32792	50
10812	1045	6.28	66	14.63		91.8764	60.638424	42
10813	1045	6.28	66	15.63		98.1564	64.783224	40
10814	1045	5.45	67	9.18	16.1	50.031	33.52077	40
10815	1045	6.18	66	15.93	16.4	98.4474	64.975284	48
10816	1045	7.44	68	17.34		129.0096	87.726528	40
10817	1045	9.23	68	19.3		178.139	121.13452	43
10818	1045	7.89	69	12.73		100.4397	69.303393	40
10819	1045	8.15	65	20.44	17.6	166.586	108.2809	45
10820	1045	9.45	65	11.01		104.0445	67.628925	45
10821	1045	6.34	70	15.68		99.4112	69.58784	50
10822	1045	5.22	47	5.81		30.3282	14.254254
10823	1045	6.93	67	19.1		132.363	88.68321	43
10824	1045	7.66	67	16.24		124.3984	83.346928	50
10825	1045	7.6	67	17.9		136.04	91.1468	45
10826	1045	10.72	50	8.27		88.6544	44.3272
10827	1045	9.01	68	18.28	19.8	164.7028	111.997904	38
10828	1045	6.92	68	15.31		105.9452	72.042736	48
10829	1045	6.22	53	20		124.4	65.932
10830	1045	10.76	46	25.02		269.2152	123.838992
10831	1045	9.64	58	23.1		222.684	129.15672
10832	1045	9.04	57	10.19		92.1176	52.507032
10833	1045	7.53	69	16.79	19.3	126.4287	87.235803	40
10834	1045	6.58	69	20.36	21.1	133.9688	92.438472	36
10835	1045	8.5	70	17.24		146.54	102.578	37
10836	1045	10.56	45	31.54		333.0624	149.87808
10837	1045	10.58	40	18.34		194.0372	77.61488
10838	1045	8.66	55	17.16		148.6056	81.73308
10839	1045	12.23	67	26.52	18.6	324.3396	217.307532	25
10840	1045	10.01	48	22.73		227.5273	109.213104
10841	1045	9.95	55	15.08		150.046	82.5253
10842	1045	10.22	50	12.36		126.3192	63.1596
10843	1045	8.53	60	10.38		88.5414	53.12484
10844	1045	10.29	50	13.41		137.9889	68.99445
10845	1045	8.13	70	16.1	12.1	130.893	91.6251	45
10846	1045	8.42	65	16.69		140.5298	91.34437	39
10847	1045	7.72	60	17.97		138.7284	83.23704
10848	1045	8.31	62	18.92		157.2252	97.479624
10849	1045	9.33	67	14.37	16.74	134.0721	89.828307	38
10850	1045	7.73	65	12.05		93.1465	60.545225	40
10851	1045	11.43	60	21.97		251.1171	150.67026
10852	1045	9	67	18.66	14.7	167.94	112.5198	35
10853	1045	8.25	67	11.5		94.875	63.56625
10854	1045	9.6	72	16.38		157.248	113.21856	39
10855	1045	10.96	63	21.46		235.2016	148.177008
10856	1045	9.13	57	7.9		72.127	41.11239
10857	1045	8.57	72	12.55	14.3	107.5535	77.43852	41
10858	1045	8.21	60	12.2		100.162	60.0972
10859	1045	9.8	58	10.1		98.98	57.4084
10860	1045	7.8	55	12.39		96.642	53.1531
10861	1045	12.52	55	23.13		289.5876	159.27318
10862	1045	9.76	50	8.95		87.352	43.676
10863	1045	5.34	40	3.41		18.2094	7.28376
10864	1045	7.66	67	10.89	15.1	83.4174	55.889658	40
10865	1045								1034	158	230	248	280	24		161	48
10866	1045									166	222	241	275	25	16	168	50
10867	1045								1133	164	218	244	286	25	15	166	50
10868	1293	10.98	76	22.62		248.3676	188.759376
10869	1293	7.71	76	23.4		180.414	137.11464
10870	1293	5.49	73	23.9		131.211	95.78403
10871	1293	5.59	72	22.22		124.2098	89.431056
10872	1293	5.33	76	20.82		110.9706	84.337656
10873	1293	6.11	75	27.22		166.3142	124.73565
10874	1293	4.59	75	18.08		82.9872	62.2404
10875	1293	6.12	73	19.92		121.9104	88.994592
10876	1293	5.52	72	11.65		64.308	46.30176
10877	1293	9.37	75	16.38		153.4806	115.11045
10878	1293	7.744	74	18.31		141.79264	104.9265536
10879	1293	5.78	78	22.35		129.183	100.76274
10880	1293	8.9	73	18.32		163.048	119.02504
10881	1293	5.82	69	27.05		157.431	108.62739
10882	1293	5.73	73	21.07		120.7311	88.133703
10883	1293	4.36	76	25.32		110.3952	83.900352
10884	1293	7.15	75	23.49		167.9535	125.965125
10885	1293	5.34	76	19.22		102.6348	78.002448
10886	1293	7.08	75	28.88		204.4704	153.3528
10887	1293	4.32	71	19.11		82.5552	58.614192
10888	1293	4.62	73	25.86		119.4732	87.215436
10889	1293	5.96	75	22.39		133.4444	100.0833
10890	1293	6.82	76	24.72		168.5904	128.128704
10891	1293	5.54	73	28.6		158.444	115.66412
10892	1293	8.29	80	28.87		239.3323	191.46584
10893	1293	5.81	69	4.37		25.3897	17.518893
10894	1293	6.36	76	23.51		149.5236	113.637936
10895	1293	7.69	73	24.63		189.4047	138.265431
10896	1293	6.11	78	23.49		143.5239	111.948642
10897	1293	8.12	75	19.27		156.4724	117.3543
10898	1293	7.33	76	23.58		172.8414	131.359464
10899	1293	6.1	78	19.51		119.011	92.82858
10900	1293	4.26	76	24.69		105.1794	79.936344
10901	1293	9.87	75	21.52		212.4024	159.3018
10902	1293	5.01	78	22.44		112.4244	87.691032
10903	1293	7.3	74	21.17		154.541	114.36034
10904	1293	2.85	78	26.39		75.2115	58.66497
10905	1293	5.79	73	22.28		129.0012	94.170876
10906	1293	2.49	75	15.62		38.8938	29.17035
10907	1293	3.99	74	26.07		104.0193	76.974282
10908	1293	7.78	70	23.27		181.0406	126.72842
10909	1293	6.54	76	22		143.88	109.3488
10910	1293	7.8	70	20.56		160.368	112.2576
10911	1293	3.54	70	19.64		69.5256	48.66792
10912	1293	4.59	73	20.51		94.1409	68.722857
10913	1293	3.51	70	20.76		72.8676	51.00732
10914	1293	7.57	71	20.1		152.157	108.03147
10915	1293	7.72	67	22.97		177.3284	118.810028
10916	1293	8.57	70	29.19		250.1583	175.11081
10917	1293	6.25	65	23.49		146.8125	95.428125
10918	1293	7.72	54	25.41		196.1652	105.929208
10919	1293	9.37	71	16.38		153.4806	108.971226
10920	1293	5	68	16.39		81.95	55.726
10921	1293	5.26	72	21.68		114.0368	82.106496
10922	1293	5.71	70	18.22		104.0362	72.82534
10923	1293	6.58	68	23.77		156.4066	106.356488
10924	1293	4.41	60	29.13		128.4633	77.07798
10925	1293	7.29	66	17.71	16.9	129.1059	85.209894	40
10926	1293	3.9	67	20.77		81.003	54.27201	35
10927	1293	5.71	69	29.57		168.8447	116.502843	15
10928	1293	6.94	68	23.41		162.4654	110.476472	35
10929	1293	7.61	68	26	9.8	197.86	134.5448	15
10930	1293	6.05	67	22.07		133.5235	89.460745	39
10931	1293	7.89	70	29.11		229.6779	160.77453	35
10932	1293	3.38	68	35.83	13.4	121.1054	82.351672	35
10933	1293	3.99	67	21.86		87.2214	58.438338	35
10934	1293	3.58	68	18.29		65.4782	44.525176	47
10935	1293	5.08	68	24.27		123.2916	83.838288	43
10936	1293	5.08	68	20.7		105.156	71.50608	33
10937	1293	4	70	22.26		89.04	62.328	42
10938	1293	5.12	70	30.47		156.0064	109.20448	39
10939	1293	10.35	66	18.97	12.8	196.3395	129.58407	20
10940	1293	7.19	69	26.63		191.4697	132.114093	25
10941	1293	6.26	50	26.43		165.4518	82.7259
10942	1293	8.49	68	27.33	17	232.0317	157.781556	47
10943	1293	4.76	67	25.08		119.3808	79.985136	35
10944	1293	6.87	67	29.08	13.4	199.7796	133.852332	35
10945	1293	7.67	67	23		176.41	118.1947	35
10946	1293	3.24	67	21.99		71.2476	47.735892	32
10947	1293	7.18	60	34.44		247.2792	148.36752
10948	1293	7.17	61	32.49		232.9533	142.101513
10949	1293	12.56	62	23.57		296.0392	183.544304
10950	1293	4.46	67	29.15	13.2	130.009	87.10603	42
10951	1293	3.04	66	25.87		78.6448	51.905568	48
10952	1293	7.4	68	26.03		192.622	130.98296	50
10953	1293	4.54	60	29.64		134.5656	80.73936
10954	1293	3.95	50	32.96		130.192	65.096
10955	1293	9.73	67	24.1	10.3	234.493	157.11031	32
10956	1293	10.85	58	22.34		242.389	140.58562
10957	1293	4.71	60	22.6		106.446	63.8676
10958	1293	7.11	67	23.47		166.8717	111.804039	25
10959	1293	6.3	65	22.66		142.758	92.7927	40
10960	1293	7.57	55	15.71		118.9247	65.408585
10961	1293	7.27	70	24.51	12.3	178.1877	124.73139	42
10962	1293	6.01	67	20.28		121.8828	81.661476	46
10963	1293	7.7	65	34.86		268.422	174.4743	20
10964	1293	7.38	55	29.84		220.2192	121.12056
10965	1293	9.01	68	25.68	17.2	231.3768	157.336224	20
10966	1293	7.87	67	24.97		196.5139	131.664313	38
10967	1293	4.32	62	35.32		152.5824	94.601088
10968	1293	3.99	67	24.6		98.154	65.76318	35
10969	1293	2.48	68	24.58		60.9584	41.451712	35
10970	1293	6.27	70	29.07	21	182.2689	127.58823	30
10971	1293	5.59	67	23.14		129.3526	86.666242	40
10972	1293	8.3	67	24.18		200.694	134.46498	37
10973	1293	6.62	71	20.13		133.2606	94.615026	37
10974	1293	6.27	67	20.99	14.6	131.6073	88.176891	36
10975	1293	6.75	70	22.88		154.44	108.108	36
10976	1293	7.35	69	26.72		196.392	135.51048	39
10977	1293	7	69	18.38		128.66	88.7754	35
10978	1293	5.02	69	24.93	17.7	125.1486	86.352534	35
10979	1293	9.75	68	28.95		282.2625	191.9385	30
10980	1293	9.86	68	29.18		287.7148	195.646064	35
10981	1293	9.1	67	15.9		144.69	96.9423	42
10982	1293	6.07	68	25.9		157.213	106.90484	45
10983	1293	9.85	68	22.68		223.398	151.91064	37
10984	1293	7.58	67	23.26		176.3108	118.128236	33
10985	1293	8.5	67	24.86		211.31	141.5777	27
10986	1293	7.03	70	24.71	16.6	173.7113	121.59791	37
10987	1293	7.29	68	20.74		151.1946	102.812328	39
10988	1293	10.34	67	22.65		234.201	156.91467	15
10989	1293	5.88	69	19.19		112.8372	77.857668	40
10990	1293	8.79	50	23.69		208.2351	104.11755
10991	1293	14.09	62	20.82		293.3538	181.879356
10992	1293	8.48	67	26.37		223.6176	149.823792
10993	1293	14.47	67	24.67	15.3	356.9749	239.173183	22
10994	1293	13.67	60	26.45		361.5715	216.9429
10995	1293	9.8	69	20.2		197.96	136.5924	40
10996	1293								970	162	232	240	263			161
10997	1046	7.28	68	15.25		111.02	75.4936
10998	1046	9.32	70	7.21		67.1972	47.03804
10999	1046	9.09	67	9.52		86.5368	57.979656
[truncated: 57,616 more rows]
